# Supplementary material for: Nuclear translocation of SIRT4 mediates deacetylation of U2AF2 to modulate renal fibrosis through alternative splicing-mediated upregulation of CCN2
Source: eLife. 2024 Nov 4;13:RP98524. doi: 10.7554/eLife.98524 (PMC11534337; doi:10.7554/eLife.98524)
Supplement: Supplementary file 1. — (a) Differential expressed genes in SIRT4 OE TECs vs Ctrl TECs. Differential expression was performed with DESeq, P<0.01. (b) Genes with significantly different intron retention events in SIRT4 OE TECs vs Ctrl TECs (FDR <0.05). (c) Clinical characteristics of CKD in biopsy samples Data are calculated by One-way ANOVA and presented as mean ± SEM. The number of patients in each group was as indicated. NS: not significant difference, y: year. (d) Primers used in qPCR. (e) Primers used in IR Index. [file elife-98524-supp1.xls]

## Sheet: 1a TGF+S4OEvsTGF P＜0.01
Gene_id	logFC	AveExpr	t	P.Value	adj.P.Val	B
DDIT4	-0.584642	5.82872	-49.5253	3.70886e-07	0.0129478	7.34466
SIRT4	4.99134	3.19868	40.698	8.70297e-07	0.0129478	6.3205
LOC124902402	0.114748	0.0573741	39.2418	1.01951e-06	0.0129478	6.12957
KLF10	0.526625	4.18458	29.2527	3.64718e-06	0.0267526	4.5842
GADD45B	0.671329	4.15306	28.8806	3.85527e-06	0.0267526	4.5167
RSKR	-0.158359	0.858079	-28.0361	4.3843e-06	0.0267526	4.36019
TOMM22	0.137441	4.69982	27.209	4.99163e-06	0.0267526	4.20222
CTSH	0.473582	5.7994	26.4771	5.61734e-06	0.0267526	4.05835
KHDC4	-0.344578	3.85161	-25.5567	6.54715e-06	0.0277163	3.87167
RARG	-0.282126	2.90203	-21.7235	1.32201e-05	0.0503687	3.01424
CNFN	0.28729	1.55664	21.1342	1.48872e-05	0.0515638	2.8692
IL11	0.767218	2.00684	20.4036	1.73286e-05	0.0549716	2.6837
L2HGDH	-0.198818	2.24842	-19.22	2.24228e-05	0.0549716	2.36878
JPT1	-0.130774	6.21399	-19.0506	2.32951e-05	0.0549716	2.32214
CCN1	0.469502	9.3551	19.0021	2.35521e-05	0.0549716	2.30873
THBS2	0.570736	3.85301	18.3559	2.73375e-05	0.0549716	2.12656
LHFPL3-AS2	-0.538128	0.73906	-18.2538	2.80018e-05	0.0549716	2.09721
PTPRE	0.41118	3.00768	18.2334	2.81371e-05	0.0549716	2.09132
C1S	0.227395	4.86323	18.2116	2.82826e-05	0.0549716	2.08501
ABCC3	0.505586	3.72121	18.1268	2.88565e-05	0.0549716	2.06046
HTATIP2	-0.150461	5.17369	-17.6984	3.19851e-05	0.0580302	1.93462
PRDX3	-0.129797	7.51533	-17.3703	3.46659e-05	0.0595829	1.83622
TSC22D3	-0.408105	5.74247	-17.2219	3.59687e-05	0.0595829	1.79112
SPRY2	0.235926	3.46541	16.9058	3.89507e-05	0.0618342	1.69374
GPR37	0.146658	1.22692	16.2474	4.61977e-05	0.0648093	1.48511
NUAK2	0.384601	5.21638	16.2182	4.65558e-05	0.0648093	1.47567
LOC112267933	-0.0965393	0.0482696	-16.1581	4.73036e-05	0.0648093	1.45619
DAB2	0.326622	3.0953	15.9955	4.94025e-05	0.0648093	1.4031
HES1	1.1337	4.04817	15.8791	5.09763e-05	0.0648093	1.36476
MTFR1L	-0.132709	4.07929	-15.8751	5.1031e-05	0.0648093	1.36345
PTGR3	-0.186304	1.59694	-15.6337	5.44982e-05	0.0657034	1.28307
EPHX1	-0.13658	6.54068	-15.5792	5.53207e-05	0.0657034	1.26475
EGR2	0.929558	1.24825	15.3881	5.83257e-05	0.0657034	1.20007
LOC101926944	0.0950411	0.0475205	15.3437	5.90524e-05	0.0657034	1.18493
HCAR2	-0.0265941	0.0324474	-15.2286	6.099e-05	0.0657034	1.14546
SLC18B1	0.344058	4.33424	15.0917	6.33967e-05	0.0657034	1.09814
SRF	0.303067	4.23861	15.069	6.38064e-05	0.0657034	1.09026
ATP6V0D1	-0.155438	6.07181	-14.6398	7.22104e-05	0.0706949	0.938973
ST3GAL2	-0.117009	3.18395	-14.481	7.56599e-05	0.0706949	0.881917
SMAD7	0.742868	3.38103	14.4258	7.69061e-05	0.0706949	0.861941
CCN2	1.14808	7.14202	14.3689	7.82167e-05	0.0706949	0.841281
WIPF1	0.186088	1.62595	14.3347	7.90193e-05	0.0706949	0.828799
PPP2R1B	-0.209701	3.0002	-14.3023	7.97869e-05	0.0706949	0.816979
GTF3C3	0.115777	3.54944	14.2094	8.2042e-05	0.0710409	0.782901
SLC2A11	-0.16762	2.61523	-14.057	8.59128e-05	0.0727395	0.726537
ZNF341	-0.125514	0.907349	-13.7351	9.48492e-05	0.0785599	0.605557
LRIF1	-0.180807	3.63918	-13.4934	0.000102317	0.0829417	0.512911
DR1	-0.103758	3.5233	-13.3374	0.000107519	0.0853434	0.452279
JAG1	-0.486461	3.186	-13.228	0.000111365	0.0865917	0.409323
EGR3	0.652623	0.439108	13.1091	0.000115733	0.0881883	0.362296
RRM2	-0.558535	6.00984	-12.9975	0.000120027	0.0890952	0.317767
DUSP5	0.947789	3.87371	12.9165	0.000123268	0.0890952	0.285192
LOC112267917	0.0170394	0.0721024	12.8555	0.000125777	0.0890952	0.260563
LOC124904309	-0.0803252	0.206095	-12.7507	0.000130241	0.0890952	0.217939
PFKFB3	0.495395	5.44394	12.7481	0.000130354	0.0890952	0.216877
TCIM	0.593958	4.56077	12.7337	0.000130983	0.0890952	0.211
UBE2G2	0.122756	4.07345	12.6815	0.000133292	0.0890952	0.189639
PNPLA6	-0.153334	4.04276	-12.5485	0.000139406	0.0902216	0.134829
TRIB1	0.491012	4.78522	12.5205	0.000140739	0.0902216	0.123194
LOC107985576	-0.0390289	0.0206984	-12.4926	0.000142081	0.0902216	0.111598
PRKAR2B	-0.313297	2.70602	-12.4395	0.00014468	0.0903656	0.0894485
MAPKAPK2	0.158368	5.90048	12.3876	0.000147275	0.0905028	0.0677235
LOC105379064	0.0196327	0.0102238	12.2518	0.000154337	0.093337	0.0104888
MSMO1	-0.261108	5.82332	-12.1764	0.00015844	0.0943211	-0.0215708
IER3	0.803401	6.71858	12.082	0.000163762	0.0959895	-0.0619392
SESN2	-0.293928	3.75897	-11.9742	0.000170115	0.0968731	-0.108448
HHAT	0.212312	3.23617	11.8979	0.000174793	0.0968731	-0.141593
ZC3H11A	0.477257	4.81734	11.8745	0.000176257	0.0968731	-0.151783
EGR1	1.46933	5.3417	11.8584	0.000177277	0.0968731	-0.15883
ZNF844	-0.153338	0.757082	-11.8473	0.000177982	0.0968731	-0.163679
CLK1	-0.470327	4.4126	-11.7265	0.000185889	0.0975677	-0.216783
SAT1	0.369291	6.96785	11.7043	0.00018739	0.0975677	-0.226607
PADI1	0.238844	1.01085	11.6923	0.000188205	0.0975677	-0.231911
CSRNP1	0.477276	2.97604	11.6734	0.000189502	0.0975677	-0.240297
EPHB4	-0.131491	3.0599	-11.6116	0.000193817	0.0978151	-0.2678
ZNF319	0.297818	3.45381	11.5933	0.000195117	0.0978151	-0.275967
SAV1	0.145922	3.69868	11.4191	0.00020804	0.102939	-0.354302
MARK2	0.0754188	2.98012	11.3247	0.000215479	0.103701	-0.397216
CDC42EP3	0.309328	4.23425	11.3117	0.000216531	0.103701	-0.403163
SWT1	0.13605	1.56689	11.2704	0.000219904	0.103701	-0.422043
CTSO	0.246898	2.62472	11.2636	0.000220467	0.103701	-0.425165
AFAP1	0.21093	2.64763	11.2142	0.000224607	0.10436	-0.447885
AMOTL2	0.292525	6.13208	11.072	0.000237058	0.108818	-0.513771
MMP12	-0.0251836	0.0125918	-10.9583	0.00024763	0.11152	-0.567047
SCYL1	-0.0601902	4.38137	-10.9461	0.000248798	0.11152	-0.572793
SMTNL2	-0.357933	3.45517	-10.8987	0.000253395	0.11226	-0.595148
XKR3	-0.0989205	0.0540823	-10.8142	0.000261865	0.112386	-0.63529
LOC124902141	0.0965722	0.225793	10.8136	0.000261924	0.112386	-0.635565
PLEKHG3	-0.0862516	2.62142	-10.8077	0.000262528	0.112386	-0.638379
RAB3IP	-0.0604385	2.65639	-10.7398	0.000269608	0.114134	-0.670868
TIMM10B	0.230966	3.04402	10.5578	0.000289759	0.120626	-0.758858
CNTN4	0.27308	1.43858	10.5447	0.000291275	0.120626	-0.765225
ZNF20	-0.257749	1.32245	-10.4071	0.000307846	0.120758	-0.832758
PTGDS	0.337482	4.63306	10.3906	0.000309914	0.120758	-0.84093
CBARP-DT	0.0880591	0.0440295	10.3648	0.000313168	0.120758	-0.853678
IAH1	0.28425	2.6753	10.3244	0.000318361	0.120758	-0.87375
MYADM	0.305114	3.94401	10.3214	0.000318755	0.120758	-0.875258
JUNB	0.466827	6.21903	10.2628	0.000326489	0.120758	-0.904512
IER2	0.682468	5.94416	10.2617	0.000326632	0.120758	-0.905049
VEGFA	0.189985	3.69407	10.2539	0.00032768	0.120758	-0.908956
STX12	0.095377	3.4939	10.247	0.000328612	0.120758	-0.912423
ATP1B3	-0.125648	6.87917	-10.2152	0.000332933	0.120758	-0.928362
FSTL3	0.419712	5.02959	10.1914	0.000336212	0.120758	-0.940321
SLC24A5	-0.0277679	0.0247069	-10.1715	0.000338986	0.120758	-0.95035
FGF14	-0.01816	0.0107006	-10.1494	0.000342097	0.120758	-0.961496
ARPC1A	-0.217172	6.0653	-10.1384	0.000343669	0.120758	-0.967089
CAMK2N2	-0.239549	4.00251	-10.1292	0.000344975	0.120758	-0.971715
DCP2	-0.327585	2.80683	-10.1065	0.00034824	0.120758	-0.983212
OXER1	0.0443546	0.0221773	10.099	0.000349341	0.120758	-0.987063
RFTN1	0.207796	3.9726	10.0977	0.000349521	0.120758	-0.98769
NECAB1	-0.42261	1.47671	-10.0756	0.000352752	0.120758	-0.998916
MICA	-0.192081	4.72884	-10.0605	0.000354985	0.120758	-1.00662
CLSTN2-AS1	-0.0290351	0.0145176	-10.037	0.000358495	0.120873	-1.01862
CHI3L1	0.327632	1.01595	9.97769	0.000367526	0.122831	-1.04897
GYPC	0.318369	3.62119	9.9165	0.000377141	0.124662	-1.08047
ARF6	-0.0871138	5.16897	-9.90149	0.000379547	0.124662	-1.08823
CCDC102A	-0.191917	3.14143	-9.8246	0.000392166	0.12696	-1.12812
MCU	-0.139819	5.02877	-9.81838	0.000393209	0.12696	-1.13136
TRIM28	-0.19307	6.81246	-9.78606	0.000398684	0.127089	-1.14823
LINC00158	-0.0961704	0.127106	-9.77166	0.000401153	0.127089	-1.15576
MYO1D	0.280171	2.78835	9.75326	0.000404336	0.127089	-1.1654
MXI1	0.217893	3.69773	9.73827	0.000406951	0.127089	-1.17326
STOX1	-0.422003	1.97555	-9.69908	0.000413886	0.127101	-1.19387
MT2A	0.638809	8.55992	9.67067	0.000419005	0.127101	-1.20886
RNF115	-0.0693255	3.01173	-9.66724	0.00041963	0.127101	-1.21068
PDHA1	-0.0927118	5.29597	-9.64195	0.000424259	0.127101	-1.22405
TRIP10	0.0829777	5.53699	9.60905	0.000430376	0.127101	-1.24151
FAM171B	-0.112092	1.66875	-9.60637	0.000430878	0.127101	-1.24293
B4GALNT1	-0.112159	3.00424	-9.59439	0.000433136	0.127101	-1.24931
LOC124903726	-0.242919	0.121459	-9.57625	0.000436581	0.127101	-1.25897
ALYREF	-0.336885	5.37824	-9.57398	0.000437014	0.127101	-1.26018
RSRP1	-0.485761	3.89669	-9.55202	0.000441236	0.127357	-1.2719
LOC124906023	0.100331	0.0501657	9.52072	0.000447339	0.128148	-1.28865
FGFR4	-0.227237	3.84212	-9.46321	0.000458822	0.130456	-1.31955
GAS6	0.36958	4.12746	9.42324	0.000467016	0.131555	-1.34113
DAZAP2	0.119455	6.58312	9.3977	0.000472346	0.131555	-1.35496
PLK2	0.283794	7.67744	9.36397	0.000479498	0.131555	-1.37328
GLA	-0.239866	5.24787	-9.36121	0.00048009	0.131555	-1.37478
WNK2	0.0135984	0.00713284	9.34731	0.000483079	0.131555	-1.38235
EPHA4	-0.291125	2.00661	-9.34373	0.000483852	0.131555	-1.3843
PTPRH	0.233865	1.81849	9.30815	0.000491627	0.131555	-1.40373
RNFT1	-0.200123	3.04355	-9.29458	0.000494632	0.131555	-1.41116
HSDL1	-0.0675738	3.7395	-9.2669	0.000500831	0.131555	-1.42634
COQ8A	0.152479	3.23509	9.25381	0.000503797	0.131555	-1.43353
H2BC21	0.539138	1.26983	9.2497	0.000504731	0.131555	-1.43579
ATF3	0.71616	3.59032	9.23744	0.000507534	0.131555	-1.44254
GPI	-0.238562	6.23723	-9.23727	0.000507574	0.131555	-1.44264
HDAC7	0.136216	4.56871	9.21579	0.00051253	0.131942	-1.45448
MVK	-0.237676	3.36659	-9.19887	0.000516474	0.132065	-1.46382
JAM3	0.202769	2.96622	9.17716	0.000521593	0.132079	-1.47584
LOC124903692	0.0275308	0.0153845	9.15518	0.000526838	0.132079	-1.48803
MPC2	-0.366716	5.90147	-9.1548	0.000526929	0.132079	-1.48824
HSPH1	-0.144221	4.82538	-9.13634	0.000531384	0.132325	-1.4985
PPP1R3C	-0.508015	2.76506	-9.11329	0.00053701	0.132858	-1.51134
LGALS1	-0.127858	9.28014	-9.02266	0.000559854	0.136824	-1.5621
ABALON	0.315862	2.77566	9.02122	0.000560226	0.136824	-1.56291
BRIP1	-0.135136	2.46859	-9.00015	0.00056571	0.137284	-1.57477
PLCXD1	-0.161956	2.80473	-8.97239	0.000573035	0.138181	-1.59045
RHOV	-0.248784	1.61706	-8.94908	0.000579277	0.13822	-1.60364
CSGALNACT2	0.269932	2.83907	8.94467	0.000580468	0.13822	-1.60615
RGS11	0.0773429	0.111899	8.89508	0.000594055	0.13822	-1.63433
ZNF700	-0.18361	2.8658	-8.89371	0.000594436	0.13822	-1.63511
NKRF	-0.142196	3.08561	-8.88238	0.000597598	0.13822	-1.64157
DSE	0.117998	2.95228	8.88183	0.000597754	0.13822	-1.64189
ARMT1	-0.222734	5.39481	-8.87884	0.00059859	0.13822	-1.6436
C3orf52	-0.166289	4.02112	-8.81922	0.000615603	0.140895	-1.67773
AIFM1	-0.233049	4.94019	-8.81244	0.000617573	0.140895	-1.68162
OPRD1	-0.203069	1.12144	-8.73522	0.000640582	0.144555	-1.72617
PDK4	-0.609856	2.34336	-8.7332	0.0006412	0.144555	-1.72734
PDIA4	-0.157561	5.89428	-8.68722	0.000655414	0.146248	-1.75404
B3GNT2	-0.250033	2.81098	-8.6718	0.000660267	0.146248	-1.76303
LOC105375549	0.04832	0.0550214	8.66547	0.000662272	0.146248	-1.76672
JUN	0.464676	6.30749	8.6581	0.000664615	0.146248	-1.77102
INTS6	-0.219649	2.58477	-8.64781	0.000667902	0.146248	-1.77703
LOC124909476	0.0206075	0.0123772	8.63197	0.000673005	0.146514	-1.78629
DZANK1	-0.259516	1.35768	-8.61892	0.000677241	0.146514	-1.79393
SERTAD4-AS1	0.350436	3.91575	8.58968	0.000686859	0.146514	-1.8111
GADD45A	0.476012	5.00216	8.58502	0.000688405	0.146514	-1.81384
PPM1F	0.164851	3.26872	8.58439	0.000688617	0.146514	-1.81421
LIPG	-0.502205	3.96831	-8.56477	0.000695183	0.146514	-1.82577
MT1E	0.925004	6.34821	8.56223	0.000696038	0.146514	-1.82726
LOC124901811	-0.264243	1.07873	-8.53978	0.000703655	0.147304	-1.84051
CLK2	-0.129859	4.51948	-8.47433	0.000726455	0.151246	-1.87933
LRMDA	0.24351	2.19112	8.45651	0.000732816	0.151741	-1.88994
RUSC2	0.230839	2.98202	8.43669	0.000739973	0.152394	-1.90177
ADAMTS1	0.606696	3.49405	8.42507	0.000744208	0.152443	-1.90871
SSU72	-0.139162	5.78	-8.38603	0.000758655	0.153565	-1.93211
FOXN3	0.159229	2.2607	8.38293	0.000759816	0.153565	-1.93397
C1QTNF1	0.272234	0.449965	8.37278	0.000763635	0.153565	-1.94007
REPS2	0.237554	1.26343	8.36702	0.000765812	0.153565	-1.94354
PPP1R11	0.109586	4.66341	8.33082	0.000779675	0.154849	-1.96537
EXOSC2	0.120946	4.26163	8.32617	0.000781476	0.154849	-1.96818
SERPINH1	-0.154436	7.82758	-8.3167	0.000785163	0.154849	-1.9739
IRF2	0.17018	3.47331	8.30698	0.000788968	0.154849	-1.97978
UBB	-0.167353	9.33724	-8.27491	0.000801684	0.154849	-1.99924
FAM104A	-0.0583402	3.35898	-8.27306	0.000802429	0.154849	-2.00037
HOXC9	-0.253662	2.04014	-8.26774	0.000804563	0.154849	-2.0036
LHX1	0.390533	3.68243	8.26733	0.000804726	0.154849	-2.00385
HAUS7	-0.131607	3.2933	-8.24206	0.000814974	0.156033	-2.01924
GNAS	-0.231364	8.98819	-8.22339	0.000822642	0.156513	-2.03063
SQLE	-0.28355	5.70586	-8.20827	0.000828922	0.156513	-2.03989
NPBWR2	-0.0185942	0.00929709	-8.20615	0.000829806	0.156513	-2.04118
CDC42EP1	0.213638	4.99362	8.1791	0.000841193	0.156595	-2.05776
CTIF	0.252181	2.86509	8.16581	0.00084686	0.156595	-2.06593
SBDS	0.0975178	5.13909	8.16518	0.00084713	0.156595	-2.06632
MYOSLID-AS1	0.291012	0.493222	8.15462	0.000851667	0.156595	-2.07281
WIPI1	0.134241	2.45947	8.1368	0.000859389	0.156595	-2.08379
ARL6IP5	-0.270797	6.0791	-8.13651	0.000859516	0.156595	-2.08397
LOC124902525	-0.0550387	0.0275193	-8.13221	0.000861393	0.156595	-2.08662
SERPINA1	0.277932	5.16128	8.12559	0.000864295	0.156595	-2.09072
POLR2I	-0.153999	5.1264	-8.11833	0.000867487	0.156595	-2.0952
ZNF780A	-0.210384	2.03285	-8.10961	0.00087134	0.156595	-2.10059
LOC124901732	-0.0548515	0.0274257	-8.09839	0.000876329	0.156752	-2.10753
DHRS11	-0.221091	2.58392	-8.07314	0.000887686	0.158041	-2.12319
CORO2A	0.207841	2.42926	8.02323	0.000910669	0.161055	-2.15428
FNDC1	-0.00969281	0.0060868	-8.0181	0.000913068	0.161055	-2.15748
LOC124900761	0.0130122	0.00995598	8.00436	0.000919545	0.161265	-2.16607
PMEPA1	0.510161	4.07576	7.99766	0.000922721	0.161265	-2.17026
SIAH2	-0.201328	4.0198	-7.95287	0.000944305	0.164283	-2.19838
CNRIP1	0.31856	1.78075	7.9243	0.000958397	0.165977	-2.21638
G6PD	-0.23948	5.74951	-7.9125	0.000964291	0.165999	-2.22384
CAMTA2-AS1	0.127965	0.371466	7.90663	0.000967238	0.165999	-2.22755
UBTD1	-0.141055	4.16795	-7.88939	0.000975961	0.166745	-2.23846
CDKN1B	-0.275624	4.83083	-7.86309	0.000989453	0.167446	-2.25515
RTF2	0.0724096	5.1947	7.86281	0.0009896	0.167446	-2.25533
LINC01186	0.293602	2.05487	7.84738	0.000997622	0.167446	-2.26514
C10orf95-AS1	-0.230956	3.02318	-7.83774	0.00100267	0.167446	-2.27128
RASA3-IT1	-0.0314966	0.0393323	-7.83638	0.00100339	0.167446	-2.27215
LY6E-DT	-0.172459	0.260997	-7.82721	0.00100823	0.167446	-2.278
LOC124904957	-0.0702776	0.119451	-7.82231	0.00101083	0.167446	-2.28113
ERO1B	0.229914	2.11907	7.81254	0.00101603	0.167579	-2.28736
CGN	-0.371971	1.93364	-7.80061	0.00102243	0.167798	-2.295
SSX2IP	-0.204044	2.99656	-7.79368	0.00102617	0.167798	-2.29943
HGD	-0.2217	3.74622	-7.77489	0.00103639	0.168745	-2.31148
LOC112268327	-0.0738012	0.35684	-7.75222	0.00104889	0.169555	-2.32605
MAML2	0.333977	1.86594	7.74975	0.00105026	0.169555	-2.32764
SLC27A3	-0.380194	1.73015	-7.73449	0.00105879	0.170211	-2.33746
GPRC5A	0.247639	3.46595	7.72425	0.00106456	0.170419	-2.34407
IFNGR1	0.138534	5.02043	7.68927	0.00108457	0.172381	-2.36669
RBM3	0.19623	5.83951	7.68702	0.00108587	0.172381	-2.36814
LOC100506321	-0.0947884	0.0473942	-7.66101	0.00110106	0.173852	-2.38503
ALDH9A1	-0.132398	5.13059	-7.65559	0.00110426	0.173852	-2.38855
HOXA9	-0.443117	5.51721	-7.63317	0.00111762	0.1751	-2.40315
PORCN	0.279164	1.9373	7.62691	0.00112137	0.1751	-2.40723
LOC105369844	0.215515	0.51399	7.61527	0.00112842	0.17548	-2.41484
DNAJC6	-0.200604	2.0491	-7.60318	0.00113579	0.175855	-2.42274
MYC	0.409893	4.86864	7.59138	0.00114303	0.175855	-2.43047
DARS1	0.14872	4.94242	7.58358	0.00114785	0.175855	-2.43558
LOC107985648	0.0867897	0.136921	7.56686	0.00115827	0.175855	-2.44655
GPR157	-0.0673818	0.909417	-7.56611	0.00115874	0.175855	-2.44704
CBR1	-0.163915	5.24288	-7.55592	0.00116515	0.175855	-2.45374
C21orf58	-0.220252	2.93257	-7.55576	0.00116525	0.175855	-2.45385
STRIP2	-0.0394503	2.75146	-7.5518	0.00116775	0.175855	-2.45645
SAMD4A	0.254974	3.31662	7.52755	0.00118322	0.177155	-2.47243
ECI1	-0.200176	5.28486	-7.52372	0.00118569	0.177155	-2.47496
CTSB	0.11019	6.48469	7.49925	0.00120159	0.17883	-2.49114
FDFT1	-0.186549	6.16552	-7.47966	0.0012145	0.179263	-2.50412
HADHA	-0.114228	5.62874	-7.47557	0.00121722	0.179263	-2.50684
LOC105371275	-0.168417	0.216998	-7.46851	0.00122193	0.179263	-2.51153
SHOX2	-0.13022	3.89342	-7.46644	0.00122332	0.179263	-2.5129
ARHGEF9	0.178932	2.51161	7.45076	0.00123387	0.180117	-2.52333
MSRB1	-0.260365	4.44704	-7.44039	0.00124091	0.180453	-2.53024
ATP5F1A	-0.159463	5.70964	-7.43164	0.00124689	0.180633	-2.53607
GPR137B	0.369316	3.94214	7.42392	0.00125219	0.180714	-2.54122
BHLHE40	0.475581	5.12853	7.39522	0.00127215	0.181996	-2.56042
ERP29	-0.134696	6.8205	-7.3728	0.00128801	0.181996	-2.57546
LRCH4	-0.091584	3.13804	-7.3563	0.00129984	0.181996	-2.58656
CD74	-0.0414036	6.03817	-7.3508	0.00130381	0.181996	-2.59027
TROAP	-0.181029	4.33362	-7.34698	0.00130658	0.181996	-2.59284
EFNA1	0.126156	4.6845	7.34074	0.00131112	0.181996	-2.59704
LOC124905530	0.196818	0.347659	7.33054	0.00131857	0.181996	-2.60392
LOC124901022	0.0766396	0.289668	7.32479	0.00132279	0.181996	-2.6078
SLC3A1	-0.289166	1.21219	-7.31653	0.00132889	0.181996	-2.61339
NR3C2	0.384215	1.99823	7.31359	0.00133107	0.181996	-2.61538
NRTN	-0.199347	1.69804	-7.30606	0.00133667	0.181996	-2.62047
LOC388282	0.384988	3.07053	7.30489	0.00133754	0.181996	-2.62126
LOC124901602	0.0763771	0.0478866	7.30472	0.00133767	0.181996	-2.62138
SERPINE1	1.00711	5.15477	7.29901	0.00134194	0.181996	-2.62525
MELTF	0.300745	5.8237	7.29755	0.00134304	0.181996	-2.62624
TBILA	-0.134919	0.683947	-7.29718	0.00134331	0.181996	-2.62649
LOC124905087	-0.187734	0.521649	-7.29208	0.00134715	0.181996	-2.62994
LOC107985767	-0.0664907	0.160092	-7.28698	0.00135099	0.181996	-2.6334
SH3BP4	0.317299	4.41455	7.28558	0.00135205	0.181996	-2.63435
PTTG1IP	0.201926	7.23319	7.27886	0.00135714	0.181996	-2.63892
TXNRD1	0.369221	6.48823	7.26847	0.00136506	0.181996	-2.64597
C10orf55	0.164265	0.923113	7.2605	0.00137117	0.181996	-2.65139
EGLN3	-0.351848	2.00061	-7.25514	0.0013753	0.181996	-2.65504
CXCL2	0.950003	5.47681	7.24969	0.00137952	0.181996	-2.65876
DUSP8	0.366828	2.06787	7.22089	0.00140205	0.181996	-2.67841
GLIPR1-AS1	0.312301	1.15367	7.21395	0.00140755	0.181996	-2.68316
INTS6-AS1	-0.233697	0.828244	-7.21016	0.00141056	0.181996	-2.68576
HOXA3	-0.321451	4.10876	-7.1963	0.00142164	0.181996	-2.69525
INSIG1	-0.32562	5.46664	-7.19629	0.00142166	0.181996	-2.69526
DYNLT3	0.351385	3.05774	7.19377	0.00142368	0.181996	-2.69699
DNAAF5	-0.144232	3.3796	-7.18727	0.00142892	0.181996	-2.70145
NPIPA2	0.148426	2.17783	7.1872	0.00142898	0.181996	-2.70149
LOC124900275	0.219128	2.75781	7.17729	0.00143702	0.181996	-2.70831
MAFF	0.612375	4.20481	7.17428	0.00143948	0.181996	-2.71038
IMPA2	-0.238615	6.60961	-7.16675	0.00144563	0.181996	-2.71555
PHTF1	-0.22181	4.22306	-7.16663	0.00144573	0.181996	-2.71563
LINC00537	-0.129461	0.832129	-7.16329	0.00144848	0.181996	-2.71794
ZNF587	-0.221158	3.72723	-7.15525	0.0014551	0.181996	-2.72347
NT5DC2	-0.266829	5.83916	-7.15253	0.00145735	0.181996	-2.72535
LOC389831	-0.222825	2.22164	-7.1507	0.00145887	0.181996	-2.72661
PDIA3	-0.111518	6.95209	-7.14797	0.00146113	0.181996	-2.72849
RND3	0.411138	5.02372	7.14729	0.0014617	0.181996	-2.72896
ETS2	0.389804	2.75353	7.13498	0.00147197	0.182678	-2.73745
TAF15	0.352447	5.28435	7.12469	0.00148063	0.182927	-2.74456
PPA2	-0.183139	5.51374	-7.1212	0.00148358	0.182927	-2.74698
CFB	0.333546	6.13159	7.11545	0.00148845	0.182936	-2.75096
ZBED8	-0.233093	1.34553	-7.09282	0.00150784	0.184722	-2.76665
SRGAP3-AS2	-0.021656	0.010828	-7.07897	0.00151985	0.185597	-2.77627
OLMALINC	-0.370486	3.53674	-7.0581	0.00153817	0.187122	-2.7908
RASL11B	0.127935	1.04948	7.05359	0.00154216	0.187122	-2.79394
BAG3	-0.114079	3.61189	-7.04574	0.00154914	0.187372	-2.79942
AP2M1	-0.193893	8.35072	-7.02164	0.00157082	0.189062	-2.81626
POGLUT2	-0.286092	6.69219	-7.0192	0.00157304	0.189062	-2.81798
LOC124901666	0.0251116	0.0288938	7.01025	0.00158119	0.189445	-2.82425
TIMP1	-0.0839556	7.6338	-6.99369	0.00159642	0.19067	-2.83587
KRTAP2-3	0.48804	0.738215	6.97787	0.00161113	0.191266	-2.84699
GPX2	-0.166135	0.1941	-6.97753	0.00161146	0.191266	-2.84723
PNRC1	-0.144842	5.73247	-6.96858	0.00161986	0.191588	-2.85353
KIAA2013	-0.0776682	4.58238	-6.96	0.00162796	0.191588	-2.85958
SMAD3	0.233018	4.25686	6.95863	0.00162925	0.191588	-2.86054
ANXA3	0.133303	5.54831	6.94088	0.00164619	0.192111	-2.87308
MT1M	0.43213	4.0223	6.93423	0.00165259	0.192111	-2.87778
PSMD14	-0.158311	5.57271	-6.92995	0.00165672	0.192111	-2.88081
ZNF503	-0.419852	2.98563	-6.92687	0.00165971	0.192111	-2.88299
RGP1	0.0938565	2.83656	6.92462	0.00166189	0.192111	-2.88458
IVNS1ABP	0.229198	7.68803	6.9225	0.00166395	0.192111	-2.88609
MSANTD2	-0.167398	2.28995	-6.90884	0.0016773	0.193067	-2.89577
MISP3	-0.284151	0.645888	-6.89133	0.0016946	0.193602	-2.90821
TEFM	-0.18884	2.65113	-6.89061	0.00169532	0.193602	-2.90872
LOC105375884	-0.103855	0.346316	-6.88873	0.0016972	0.193602	-2.91006
SOCS1	0.293367	2.09224	6.87478	0.00171116	0.194612	-2.91999
MRPL3	-0.174282	6.36508	-6.8683	0.0017177	0.194774	-2.92461
DMTN	-0.14117	3.76585	-6.86021	0.0017259	0.194834	-2.93038
FRMD4A	0.179868	0.898274	6.8577	0.00172845	0.194834	-2.93217
SLC25A13	-0.0886058	4.80813	-6.83841	0.00174824	0.196483	-2.94596
PDCD6IP-DT	-0.34247	0.932855	-6.8307	0.00175621	0.196508	-2.95148
GIPC1	-0.142718	5.89604	-6.82824	0.00175877	0.196508	-2.95324
IRX5	-0.639007	2.53176	-6.82206	0.00176522	0.196651	-2.95767
FBXW4	0.146045	3.88329	6.7871	0.00180221	0.199868	-2.9828
EEF1A2	-0.230108	7.64302	-6.77406	0.00181625	0.199868	-2.9922
MATN1-AS1	0.174948	0.453773	6.77211	0.00181836	0.199868	-2.9936
HMOX1	-0.122812	4.52779	-6.76885	0.00182189	0.199868	-2.99595
PHC2	0.181293	5.15855	6.76716	0.00182373	0.199868	-2.99717
MYL12A	0.170943	7.57285	6.76129	0.00183012	0.199868	-3.00141
NXN	-0.12196	4.52351	-6.75731	0.00183447	0.199868	-3.00429
LOC107984137	0.024935	0.122102	6.75587	0.00183606	0.199868	-3.00533
OGFRL1	0.541484	5.54178	6.74251	0.00185076	0.200895	-3.015
ZNF761	-0.426241	2.00886	-6.72705	0.00186797	0.202186	-3.0262
SUSD6	0.214656	2.07607	6.69517	0.00190405	0.204909	-3.04937
BHLHE40-AS1	0.123058	0.370118	6.69383	0.00190559	0.204909	-3.05035
ZNF589	-0.115852	1.70918	-6.69064	0.00190926	0.204909	-3.05268
CPNE2	-0.10381	4.57336	-6.6742	0.00192826	0.20622	-3.06467
SREBF1	-0.106391	5.3952	-6.66775	0.00193578	0.20622	-3.06938
KANSL1	0.122926	2.95036	6.6661	0.00193771	0.20622	-3.07059
PTPA	-0.0742179	5.88535	-6.65609	0.00194946	0.206892	-3.0779
C1QL1	-0.302179	4.5021	-6.64735	0.00195979	0.206994	-3.0843
XRCC2	-0.206083	2.59275	-6.6461	0.00196128	0.206994	-3.08523
FAM222B	-0.25799	2.26225	-6.63879	0.00196998	0.207338	-3.09058
ATXN2	-0.0776524	3.56556	-6.61133	0.00200308	0.210109	-3.11075
PWP1	0.128857	4.39362	6.60784	0.00200734	0.210109	-3.11333
RAD51B	0.197865	1.82006	6.60092	0.00201581	0.210417	-3.11842
FKBP4	-0.0709008	4.87571	-6.58615	0.00203403	0.210702	-3.12931
ABHD10	-0.219095	4.07117	-6.58615	0.00203403	0.210702	-3.12931
ZNF273	-0.229948	2.501	-6.58336	0.0020375	0.210702	-3.13138
CEP295	-0.0812513	1.95317	-6.57859	0.00204344	0.210702	-3.1349
C16orf87	-0.16447	1.73972	-6.57407	0.00204909	0.210702	-3.13824
ANGPTL8	0.0865212	0.0531895	6.56765	0.00205714	0.210702	-3.14299
MAB21L2	0.030826	0.0169984	6.56757	0.00205725	0.210702	-3.14305
SPATS2	-0.23097	4.40406	-6.5616	0.00206477	0.210906	-3.14747
LOC124901144	0.041507	0.0634787	6.54219	0.00208948	0.211899	-3.16186
TK2	0.514402	3.25301	6.54164	0.00209018	0.211899	-3.16227
ASB1	0.126458	3.06754	6.53494	0.00209879	0.211899	-3.16724
MMP1	0.524429	1.83015	6.53402	0.00209998	0.211899	-3.16793
TYW3	-0.10715	3.44929	-6.52457	0.00211221	0.211899	-3.17495
ACO2	-0.186067	5.15813	-6.52443	0.00211238	0.211899	-3.17505
IFIT3	0.130734	3.86178	6.52363	0.00211343	0.211899	-3.17565
LDHB	-0.25207	10.1497	-6.51452	0.00212531	0.212531	-3.18243
ZBED5	-0.121084	3.66493	-6.50469	0.00213822	0.213182	-3.18976
SLC2A1	0.407213	5.60293	6.49609	0.00214958	0.213182	-3.19617
LOC100652768	0.222951	0.532078	6.49414	0.00215218	0.213182	-3.19763
PRH2	-0.058424	0.131634	-6.49262	0.0021542	0.213182	-3.19877
CLEC20A	0.178749	0.478877	6.48732	0.00216126	0.213326	-3.20273
SLC16A4	-0.111448	2.93603	-6.47016	0.00218432	0.215036	-3.21557
DAND5	-0.166939	0.209698	-6.46486	0.00219149	0.215036	-3.21953
LOC124901663	-0.0421244	0.103744	-6.46071	0.00219714	0.215036	-3.22264
LOC105369147	-0.187979	2.80665	-6.45776	0.00220116	0.215036	-3.22486
ZFP36	0.833606	1.96569	6.45048	0.00221113	0.215458	-3.23032
SDC4	0.495372	7.52951	6.44604	0.00221723	0.215502	-3.23366
CD101	-0.101218	0.32776	-6.43826	0.00222798	0.215569	-3.23951
GGTLC2	-0.50054	2.41378	-6.43478	0.00223281	0.215569	-3.24212
LOC124907776	0.200551	0.340879	6.43327	0.00223491	0.215569	-3.24326
TMEM255B	0.155624	0.58876	6.42088	0.00225221	0.21669	-3.25259
LOC124900580	-0.184339	1.87489	-6.41485	0.00226069	0.216958	-3.25713
ADM	0.787421	2.61882	6.40932	0.00226852	0.217162	-3.26131
VAMP1	-0.323573	2.12717	-6.40476	0.00227498	0.217235	-3.26475
HAS3	0.269806	5.29475	6.39619	0.00228719	0.217818	-3.27122
LOC102723791	-0.0202865	0.0125081	-6.38957	0.00229668	0.217818	-3.27623
FUCA1	0.218308	3.36148	6.38849	0.00229824	0.217818	-3.27705
HLA-E	0.106458	5.9249	6.3844	0.00230412	0.217834	-3.28014
ERAP1	0.112853	4.44075	6.37604	0.00231623	0.218115	-3.28648
CDT1	-0.1883	4.17236	-6.37445	0.00231854	0.218115	-3.28769
CASP4	0.152035	1.57651	6.36453	0.00233302	0.218758	-3.29521
LOC105379321	0.12501	0.062505	6.3619	0.00233686	0.218758	-3.2972
ATP5PD	-0.108112	6.79333	-6.35068	0.00235341	0.219701	-3.30573
P3H3	-0.147837	5.11508	-6.34404	0.00236326	0.219701	-3.31078
BMF	0.411535	2.61812	6.34338	0.00236424	0.219701	-3.31129
HPGD	-0.345134	3.58142	-6.33591	0.00237539	0.2202	-3.31697
PFDN4	0.242891	4.03624	6.32785	0.0023875	0.220416	-3.32312
RNF185	0.062615	4.09895	6.32666	0.00238929	0.220416	-3.32403
ADGRG1	0.309444	5.96093	6.32119	0.00239755	0.220644	-3.3282
PPP1CC	-0.164153	5.90385	-6.30852	0.00241683	0.221765	-3.33788
TRIM45	-0.267792	3.33501	-6.30555	0.00242137	0.221765	-3.34015
ACAA2	-0.235447	4.585	-6.29599	0.00243607	0.222266	-3.34746
RPS27A	0.120315	9.0383	6.2944	0.00243851	0.222266	-3.34868
LOC124908009	0.0209538	0.0211595	6.28724	0.00244962	0.222615	-3.35417
NHS	-0.307631	2.86032	-6.28441	0.00245402	0.222615	-3.35634
FAM222A	-0.248429	0.870752	-6.27932	0.00246196	0.222805	-3.36024
BAHD1	-0.0797082	3.19012	-6.26302	0.00248759	0.22459	-3.37276
ZNF607	-0.212435	1.6829	-6.25686	0.00249736	0.224803	-3.37749
EIF3J	0.0644181	4.41041	6.25263	0.0025041	0.224803	-3.38075
EPHA2	0.173227	5.3531	6.25042	0.00250764	0.224803	-3.38246
PHF13	-0.0858131	4.00549	-6.23441	0.00253338	0.226577	-3.3948
GPBP1	-0.0929591	4.1106	-6.22835	0.00254321	0.226924	-3.39948
RCAN1	0.246992	2.79924	6.21785	0.00256035	0.227919	-3.40759
NXPE3	-0.122084	3.209	-6.21393	0.00256678	0.227959	-3.41062
ACTG1	-0.155232	10.707	-6.20563	0.00258047	0.228112	-3.41705
RPL7L1	0.130871	5.19358	6.20563	0.00258048	0.228112	-3.41705
RIN2	0.300947	3.39208	6.18923	0.00260778	0.229359	-3.42976
RHOB	0.488144	6.43852	6.18913	0.00260795	0.229359	-3.42984
THOC1	-0.109158	3.87031	-6.18633	0.00261265	0.229359	-3.43202
NUS1	0.139259	4.32512	6.18051	0.00262244	0.22969	-3.43654
PDP1	0.262554	4.46295	6.16056	0.00265637	0.231387	-3.45206
KCNK15	0.322246	2.30686	6.16024	0.00265692	0.231387	-3.45232
DOCK2	0.26825	0.689067	6.15842	0.00266004	0.231387	-3.45373
SLC25A28	0.116743	3.65311	6.15394	0.00266773	0.231528	-3.45722
ZNF789	-0.198355	2.93058	-6.14621	0.00268109	0.23193	-3.46325
TRNP1	-0.257343	3.8431	-6.14422	0.00268455	0.23193	-3.46481
FTL	-0.143233	10.0599	-6.13715	0.00269685	0.232466	-3.47033
EMP1	0.21958	1.45352	6.12684	0.00271492	0.232998	-3.47839
SLC17A1	-0.185182	1.9485	-6.12482	0.00271846	0.232998	-3.47997
AGT	-0.290737	3.58294	-6.12235	0.00272283	0.232998	-3.48191
OSGIN2	-0.220669	4.5653	-6.11938	0.00272808	0.232998	-3.48423
ABTB2	0.30974	1.72979	6.11458	0.00273658	0.232998	-3.48799
RMI1	-0.255281	3.2041	-6.11282	0.00273971	0.232998	-3.48937
GSAP	0.143888	1.66701	6.10875	0.00274697	0.233034	-3.49257
LOC107985362	0.025922	0.0354458	6.10333	0.00275666	0.233034	-3.49682
SLC26A2	0.305102	2.35114	6.09825	0.00276578	0.233034	-3.50081
SLC9B2	-0.102697	1.04409	-6.09779	0.00276661	0.233034	-3.50117
LINC00629	-0.0800328	0.378217	-6.0955	0.00277072	0.233034	-3.50296
LUC7L3	-0.263893	4.28433	-6.09061	0.00277956	0.233263	-3.50681
RPN2	-0.139733	7.19726	-6.0845	0.00279066	0.233679	-3.51162
SERPINB8	0.401106	2.07705	6.07225	0.00281303	0.234226	-3.52126
VCP	-0.14961	6.10561	-6.07207	0.00281337	0.234226	-3.5214
TNRC6B-DT	0.0612487	0.048798	6.07021	0.00281679	0.234226	-3.52287
MIER2	-0.129321	1.49973	-6.0675	0.00282177	0.234226	-3.525
TNFSF10	0.280854	7.42766	6.06328	0.00282958	0.234266	-3.52834
ACTR3B	-0.192223	1.4354	-6.0569	0.00284139	0.234266	-3.53337
KDM3A	-0.0244745	3.87235	-6.05331	0.00284809	0.234266	-3.53621
MRPS6	-0.0630353	5.40144	-6.0514	0.00285165	0.234266	-3.53772
CEP97	-0.14814	2.49228	-6.05067	0.002853	0.234266	-3.53829
CDK2AP1	-0.190905	5.69208	-6.0341	0.00288417	0.236096	-3.5514
ZNF365	0.150405	1.28534	6.03146	0.00288916	0.236096	-3.55349
PCSK9	-0.139102	5.67378	-6.02898	0.00289387	0.236096	-3.55546
TSHZ3	0.189265	0.919411	6.01265	0.0029251	0.237056	-3.56841
LOC102724843	-0.225237	1.07392	-6.00682	0.00293636	0.237056	-3.57305
LETM1	-0.115329	3.24792	-6.00196	0.00294578	0.237056	-3.57691
CYTH1	0.15524	3.26818	5.99612	0.00295713	0.237056	-3.58155
PRDX2	-0.162015	6.9594	-5.99012	0.00296887	0.237056	-3.58633
HK2	0.183413	1.51821	5.9886	0.00297185	0.237056	-3.58754
AMACR	-0.499052	2.82027	-5.98786	0.0029733	0.237056	-3.58813
CLCN2	-0.0756461	2.47592	-5.98785	0.00297332	0.237056	-3.58814
SLC2A2	-0.53346	0.942006	-5.98587	0.00297722	0.237056	-3.58972
DLX2	-0.193256	0.569221	-5.98458	0.00297975	0.237056	-3.59075
LIF	0.500865	4.85835	5.98214	0.00298456	0.237056	-3.5927
MTG2	-0.137414	3.13661	-5.98128	0.00298626	0.237056	-3.59338
NDRG1	0.356031	5.59387	5.97769	0.00299335	0.237056	-3.59624
CCDC113	0.198687	1.26722	5.97577	0.00299716	0.237056	-3.59778
PSMA1	-0.112457	6.40526	-5.97485	0.00299898	0.237056	-3.59851
METTL27	0.170534	0.27934	5.9686	0.00301141	0.237284	-3.6035
TMPRSS5	0.114744	0.108165	5.96715	0.00301431	0.237284	-3.60466
KCNJ15	0.116901	1.91844	5.95976	0.0030291	0.237569	-3.61057
SLC25A1	-0.167947	6.50444	-5.95848	0.00303166	0.237569	-3.61159
LOC401261	0.139642	0.915859	5.95559	0.00303748	0.237569	-3.6139
MRPS34	-0.167216	5.30133	-5.94883	0.00305114	0.237569	-3.61931
LOC124900729	-0.031326	0.0197972	-5.94809	0.00305264	0.237569	-3.61991
LUCAT1	0.397139	2.69991	5.94676	0.00305535	0.237569	-3.62097
ANKRD6	0.0836038	2.07783	5.9359	0.00307747	0.238801	-3.62968
HAO2	-0.0485882	0.0323892	-5.92667	0.00309644	0.239197	-3.63709
GASAL1	0.170647	0.422836	5.92476	0.00310036	0.239197	-3.63862
HES4	-0.353473	4.64238	-5.9222	0.00310567	0.239197	-3.64068
LOC107987101	-0.484592	1.65941	-5.92123	0.00310767	0.239197	-3.64146
QRSL1	-0.128836	3.1193	-5.91619	0.00311812	0.239455	-3.64551
COBLL1	-0.289782	3.91685	-5.9106	0.00312979	0.239455	-3.65001
TOMM20	0.116122	6.4279	5.90833	0.00313452	0.239455	-3.65183
LOC105379171	-0.077725	0.0655896	-5.90754	0.00313617	0.239455	-3.65247
ADRB2	0.348899	5.0646	5.90169	0.00314845	0.239874	-3.65718
PTPRU	0.187205	0.592236	5.89608	0.00316029	0.239874	-3.66171
ACBD5	-0.133792	3.81994	-5.89428	0.0031641	0.239874	-3.66316
CHMP1B	0.232167	4.18471	5.88689	0.00317978	0.239874	-3.66912
CISH	0.275093	2.01382	5.88547	0.00318281	0.239874	-3.67027
LOC124902245	0.0241239	0.012062	5.87836	0.00319801	0.239874	-3.67602
DNAJA3	0.0677632	3.9894	5.87834	0.00319805	0.239874	-3.67603
LOC105372390	-0.0628003	0.0793528	-5.87676	0.00320145	0.239874	-3.67731
CASC15	0.211026	0.903229	5.87543	0.00320429	0.239874	-3.67838
IDS	0.199992	4.03795	5.87529	0.00320461	0.239874	-3.6785
KANSL2	-0.0775333	3.75468	-5.8559	0.0032466	0.24254	-3.6942
KIAA1671-AS1	0.247831	0.221247	5.83917	0.00328338	0.2441	-3.70778
E2F5	-0.232012	2.76545	-5.83908	0.00328357	0.2441	-3.70785
ANXA7	-0.0607865	5.50526	-5.83767	0.0032867	0.2441	-3.709
MLYCD	-0.0969711	0.88065	-5.81896	0.00332846	0.24645	-3.72422
SLC25A30	-0.170509	4.28319	-5.81771	0.00333128	0.24645	-3.72524
KREMEN2	-0.269585	2.61147	-5.80349	0.0033635	0.247899	-3.73684
SERPINF2	-0.385308	3.4086	-5.80322	0.0033641	0.247899	-3.73706
DNA2	-0.170646	2.96664	-5.80047	0.00337039	0.247899	-3.73931
FOSB	0.808457	2.89331	5.79669	0.00337904	0.248057	-3.7424
LOC124902039	-0.0917336	0.0562692	-5.79257	0.00338849	0.248272	-3.74576
GLCCI1	-0.204519	1.98915	-5.78023	0.00341699	0.24988	-3.75586
LOC105375172	0.200713	1.13314	5.77382	0.00343193	0.249975	-3.76111
RRP15	0.118376	2.33382	5.77276	0.00343441	0.249975	-3.76198
MYL9	-0.235251	5.79538	-5.77123	0.00343798	0.249975	-3.76324
PIK3R2	-0.15674	4.10507	-5.76407	0.00345479	0.250719	-3.76911
MAP2K2	-0.266926	5.48977	-5.75813	0.0034688	0.251257	-3.77399
LOXL2	0.188086	7.14519	5.74683	0.00349564	0.252721	-3.78328
TNFRSF10A	0.265845	2.11671	5.74314	0.00350444	0.252877	-3.78631
LRPAP1	-0.116517	3.4556	-5.73368	0.00352719	0.253303	-3.7941
MGAT2	-0.173499	4.01672	-5.73047	0.00353494	0.253303	-3.79674
FHIP1A-DT	-0.108172	0.575734	-5.7255	0.00354698	0.253303	-3.80084
LHX1-DT	0.31165	2.83215	5.72491	0.00354842	0.253303	-3.80133
ZNF681	-0.240528	1.44197	-5.72269	0.00355382	0.253303	-3.80316
EGLN2	-0.219167	4.6922	-5.72223	0.00355494	0.253303	-3.80354
HS6ST1	-0.269996	2.77112	-5.72144	0.00355688	0.253303	-3.8042
NQO1	-0.223105	4.25304	-5.7178	0.00356575	0.253461	-3.8072
LOC100128653	0.22062	0.826259	5.70608	0.00359453	0.254791	-3.81688
LRP5	0.0867486	3.64414	5.70475	0.00359783	0.254791	-3.81799
ZNF691	-0.190395	2.56116	-5.70023	0.00360903	0.255109	-3.82173
R3HDM1	-0.153463	3.50307	-5.69301	0.00362697	0.255597	-3.8277
SALL1	-0.3554	4.3648	-5.68975	0.00363512	0.255597	-3.83041
SOX12	-0.207138	4.33655	-5.68465	0.00364792	0.255597	-3.83464
CNTLN	0.0426469	2.79757	5.68454	0.00364819	0.255597	-3.83473
LRIG1	-0.235118	2.53068	-5.68309	0.00365184	0.255597	-3.83593
DAPK2	0.179934	0.779366	5.68047	0.00365845	0.255597	-3.83811
RDH11	-0.211981	5.22292	-5.6787	0.00366289	0.255597	-3.83957
MAP2K4	0.074616	3.09488	5.67423	0.00367421	0.255919	-3.84329
RANBP1	-0.0565505	7.16062	-5.66881	0.00368798	0.256409	-3.84779
EIF1B-AS1	-0.156178	0.283969	-5.65614	0.0037204	0.257847	-3.85833
LOC101928415	0.09801	0.472824	5.65544	0.0037222	0.257847	-3.85891
CIAO2A	-0.192789	5.74316	-5.64731	0.00374321	0.258832	-3.86569
MED22	0.106558	4.1322	5.64249	0.00375572	0.259226	-3.86971
RIMBP3C	-0.046189	0.270816	-5.63053	0.00378699	0.260912	-3.87969
CGAS	-0.145422	3.73655	-5.62074	0.00381285	0.261986	-3.88788
LOC124901475	-0.142541	0.499309	-5.61711	0.00382247	0.261986	-3.89092
ATF6	0.13105	3.36899	5.61666	0.00382368	0.261986	-3.8913
ZIM2-AS1	0.0935302	0.814427	5.61254	0.00383464	0.261986	-3.89474
ATG13	0.0748848	3.94236	5.60808	0.00384656	0.261986	-3.89848
LOC107985577	-0.0273105	0.0166442	-5.60751	0.0038481	0.261986	-3.89896
MOV10	-0.132115	5.0896	-5.60653	0.00385072	0.261986	-3.89978
TAP1	-0.1568	4.40703	-5.59911	0.00387067	0.262164	-3.906
LOC124904423	0.510153	3.51056	5.597	0.00387638	0.262164	-3.90777
GPR37L1	0.108348	0.293301	5.59334	0.00388629	0.262164	-3.91085
RHPN2	-0.176998	3.24629	-5.59057	0.00389381	0.262164	-3.91317
EPHB2	0.42228	3.69568	5.59002	0.0038953	0.262164	-3.91363
SKOR1	0.106577	0.187843	5.58319	0.00391394	0.262164	-3.91938
RGS14	-0.245217	3.765	-5.58232	0.00391632	0.262164	-3.92011
LOC105372659	-0.0716371	0.150688	-5.5818	0.00391773	0.262164	-3.92054
KCNIP1	0.235577	3.63934	5.57902	0.00392537	0.262164	-3.92289
KLHL30	0.154456	0.64352	5.57785	0.00392856	0.262164	-3.92387
VNN1	0.570874	2.30425	5.57191	0.00394492	0.262164	-3.92887
EDN1	0.606671	2.05713	5.57033	0.0039493	0.262164	-3.9302
IDH3G	-0.0818552	5.30531	-5.56466	0.00396502	0.262164	-3.93498
CHORDC1	-0.243271	3.56262	-5.56265	0.0039706	0.262164	-3.93668
ALDH16A1	-0.115339	3.34642	-5.56203	0.00397232	0.262164	-3.9372
LINC00106	0.118228	0.967865	5.56064	0.00397619	0.262164	-3.93837
ARHGEF28	0.185037	3.80515	5.55866	0.00398171	0.262164	-3.94004
GLRX3	0.0754761	5.9088	5.55613	0.00398878	0.262164	-3.94217
PPP1R14B	-0.263525	6.26948	-5.55398	0.0039948	0.262164	-3.94399
LOC102724227	0.0186797	0.0193902	5.55194	0.00400052	0.262164	-3.94571
LOC105375018	-0.230776	0.422798	-5.54467	0.00402101	0.262164	-3.95185
BSG	-0.159761	7.95226	-5.54436	0.00402188	0.262164	-3.95212
SPOP	-0.0865576	3.58774	-5.54404	0.00402279	0.262164	-3.95239
TNFRSF9	0.148508	1.00984	5.54337	0.00402468	0.262164	-3.95295
AP1S3	-0.263605	2.36487	-5.54231	0.00402768	0.262164	-3.95385
TCF7	-0.173955	1.38499	-5.53884	0.00403752	0.262164	-3.95678
APOL2	-0.191594	3.61803	-5.53828	0.00403911	0.262164	-3.95726
LOC112268186	-0.0793558	0.213828	-5.53484	0.00404891	0.262353	-3.96017
PEX19	0.178102	3.91407	5.53224	0.00405631	0.262386	-3.96237
RNF10	-0.097407	5.18809	-5.52806	0.00406826	0.262503	-3.96591
TTC39C-AS1	0.06954	0.0441929	5.52377	0.00408059	0.262503	-3.96955
SNHG16	0.181067	4.06301	5.5234	0.00408164	0.262503	-3.96986
CHCHD1	-0.14981	5.16709	-5.522	0.00408568	0.262503	-3.97105
ANKRD28	0.193414	3.20401	5.51896	0.00409444	0.262623	-3.97363
TPM1-AS	0.512289	1.89786	5.50694	0.00412932	0.264415	-3.98383
SDCBP	0.214935	6.94028	5.49495	0.00416449	0.265803	-3.99403
CREBRF	0.25173	1.81287	5.49182	0.00417371	0.265803	-3.99669
CHMP4C	0.161898	3.08643	5.49045	0.00417776	0.265803	-3.99786
NR2F6	-0.232792	5.1013	-5.49006	0.0041789	0.265803	-3.99818
RCOR2	-0.294916	0.565211	-5.48628	0.00419012	0.266073	-4.00141
SCX	-0.375367	2.01	-5.48251	0.00420133	0.26634	-4.00462
LOC105369576	0.0117818	0.00942356	5.47743	0.00421649	0.266857	-4.00895
C6orf132	0.277949	1.69058	5.47411	0.00422644	0.267039	-4.01179
CLDN11	0.332583	6.19301	5.4718	0.00423337	0.267039	-4.01376
CRAT	-0.0902412	3.33835	-5.46803	0.00424474	0.267179	-4.01698
CLDN4	0.441213	5.55143	5.46633	0.00424985	0.267179	-4.01843
GET4	-0.124494	4.80704	-5.46409	0.00425664	0.267179	-4.02035
TLCD5	-0.128434	1.90312	-5.45908	0.00427181	0.267691	-4.02463
NDUFA8	-0.13515	5.46628	-5.45545	0.00428286	0.267943	-4.02773
FAM136A	0.0842514	5.45139	5.44923	0.00430186	0.267963	-4.03305
THAP5	-0.0940949	2.88004	-5.4489	0.00430288	0.267963	-4.03334
UBA1	-0.130147	6.54335	-5.44844	0.00430429	0.267963	-4.03373
UBE2Z	0.0869372	4.94694	5.44099	0.0043272	0.268266	-4.04011
ZNF486	-0.133521	2.01972	-5.44002	0.00433022	0.268266	-4.04095
ZNF814	-0.203922	1.65302	-5.44	0.00433028	0.268266	-4.04097
LOC124905380	-0.0184764	0.0416382	-5.43652	0.00434104	0.268307	-4.04395
ZNHIT6	0.1351	3.34865	5.43523	0.00434503	0.268307	-4.04506
CENPP	-0.101318	1.33334	-5.4269	0.00437097	0.268873	-4.05221
LOC102724428	0.597489	3.72713	5.4263	0.00437283	0.268873	-4.05272
LOC124903749	0.257838	0.4182	5.42549	0.00437537	0.268873	-4.05342
HSPB1	-0.255033	9.20001	-5.41235	0.0044167	0.270776	-4.06472
BAZ1A	-0.14731	3.53483	-5.41113	0.00442054	0.270776	-4.06577
TMUB2	0.0273497	3.86229	5.40712	0.00443326	0.271081	-4.06922
PIK3C3	0.0870907	2.50158	5.40508	0.00443975	0.271081	-4.07098
LOC105369722	-0.0565093	0.0282547	-5.40014	0.00445552	0.27111	-4.07524
MAP4K5	0.122525	3.82451	5.39934	0.00445808	0.27111	-4.07593
POGLUT1	0.0701204	2.71147	5.39824	0.00446158	0.27111	-4.07687
BBLN	0.238303	7.74802	5.39505	0.00447183	0.271301	-4.07963
GALNT7	-0.164003	4.90787	-5.38749	0.00449617	0.271851	-4.08616
LRRC15	0.0150224	0.00792794	5.38731	0.00449675	0.271851	-4.08631
SHOC1	-0.317961	1.53645	-5.38559	0.00450231	0.271851	-4.0878
ZC3H15	-0.105726	4.91512	-5.37806	0.00452675	0.272395	-4.0943
WDR35	0.191916	2.62368	5.37694	0.00453043	0.272395	-4.09528
PHLPP1	-0.173166	2.10545	-5.37471	0.00453769	0.272395	-4.0972
MED20	-0.0867323	3.57143	-5.37403	0.00453992	0.272395	-4.09779
LOC107985524	-0.0754613	0.135391	-5.3701	0.00455279	0.272738	-4.10119
LOC107986632	0.0851795	0.222419	5.36647	0.00456472	0.273016	-4.10434
H2AZ1	-0.286963	8.40001	-5.36272	0.00457709	0.273016	-4.10759
LOC101928093	0.0399976	0.0304895	5.36216	0.00457894	0.273016	-4.10807
CMTM3	0.276708	4.68326	5.35743	0.00459457	0.27352	-4.11217
ZNF606	-0.196174	2.09113	-5.35063	0.00461718	0.274438	-4.11807
LOC124903814	-0.0432851	0.19483	-5.34716	0.00462881	0.2747	-4.12109
LOC105374610	-0.0175146	0.0114999	-5.33998	0.0046529	0.274976	-4.12732
CKLF	0.330954	7.00604	5.33774	0.00466045	0.274976	-4.12927
CLN3	-0.189235	4.67951	-5.33686	0.00466341	0.274976	-4.13003
KRT80	0.304741	5.90937	5.3358	0.004667	0.274976	-4.13096
FYCO1	0.164404	1.8689	5.33505	0.00466954	0.274976	-4.13161
MIDN	0.233452	3.29556	5.33101	0.0046832	0.275197	-4.13512
LOC102724861	0.0363645	0.0722239	5.32968	0.00468773	0.275197	-4.13628
TINAGL1	0.146242	6.30936	5.32396	0.00470723	0.275339	-4.14127
ST6GALNAC5	0.217178	1.08053	5.32331	0.00470944	0.275339	-4.14183
FBXO25	0.173685	1.25312	5.32261	0.00471184	0.275339	-4.14244
COPS7A	0.0903395	4.08568	5.31969	0.00472184	0.275501	-4.14499
ZMYM2	-0.142246	3.58301	-5.31357	0.00474285	0.276219	-4.15032
SUV39H2	-0.204597	3.01427	-5.31189	0.00474865	0.276219	-4.15179
TNFRSF10D	0.245541	3.73625	5.30734	0.00476437	0.276711	-4.15576
PDGFB	0.2448	3.20471	5.29984	0.00479045	0.277378	-4.16231
HMX2	-0.200298	1.33319	-5.2968	0.00480108	0.277378	-4.16498
RASA3	0.373558	2.61725	5.29231	0.00481679	0.277378	-4.1689
GSTCD	-0.188191	3.0985	-5.2895	0.00482667	0.277378	-4.17136
CDCA7L	0.151425	4.94445	5.28521	0.00484182	0.277378	-4.17512
LINC02889	0.347395	1.73108	5.2852	0.00484184	0.277378	-4.17513
PTGER2	-0.182186	4.25339	-5.28469	0.00484363	0.277378	-4.17557
SLC43A1	0.245394	0.561538	5.28387	0.00484653	0.277378	-4.17629
P2RY4	0.0944263	0.135932	5.28147	0.00485504	0.277378	-4.1784
TPM1	0.205497	9.47967	5.27965	0.00486147	0.277378	-4.17999
PLXNB3-AS1	-0.198464	1.36907	-5.2786	0.0048652	0.277378	-4.18091
MEGF6	0.386953	3.21072	5.27607	0.00487421	0.277378	-4.18313
MRC2	0.134368	5.08557	5.27533	0.00487685	0.277378	-4.18378
CELF3	0.0208945	0.027699	5.27507	0.00487778	0.277378	-4.184
ZNF764	-0.250924	1.81493	-5.2696	0.00489732	0.27743	-4.1888
TBC1D15	0.130313	4.40793	5.26721	0.00490588	0.27743	-4.1909
GTF3C6	-0.174106	6.07519	-5.26568	0.00491139	0.27743	-4.19225
SNAPC3	-0.164462	2.52081	-5.26419	0.00491674	0.27743	-4.19356
IRS1	0.231257	3.68391	5.26271	0.00492206	0.27743	-4.19486
ARHGAP44	0.0605312	0.256979	5.26124	0.00492737	0.27743	-4.19615
ZNF672	-0.133724	3.98038	-5.25699	0.00494273	0.27743	-4.19988
PLOD1	-0.124751	5.75555	-5.25521	0.00494918	0.27743	-4.20145
PGS1	-0.25899	3.11699	-5.25329	0.00495614	0.27743	-4.20314
XKR8	-0.204129	2.17652	-5.25212	0.00496041	0.27743	-4.20417
PCCB	-0.194749	3.72638	-5.25095	0.00496465	0.27743	-4.2052
BAMBI	-0.523783	3.14185	-5.25056	0.00496608	0.27743	-4.20554
CAMSAP1-DT	0.105092	1.03441	5.24595	0.00498289	0.277932	-4.2096
TMEM154	-0.0945182	0.513175	-5.24354	0.00499173	0.277932	-4.21173
LOC105375154	0.0311244	0.0155622	5.24211	0.00499694	0.277932	-4.21298
SERTAD2	0.173745	3.95545	5.23382	0.00502746	0.278729	-4.22029
LOC124903715	-0.0575039	0.179535	-5.23017	0.00504099	0.278729	-4.22351
USP45	-0.116368	2.5561	-5.23012	0.00504116	0.278729	-4.22355
FAM210B	0.151762	3.18143	5.22995	0.00504182	0.278729	-4.22371
HOXA-AS2	-0.517953	2.76936	-5.22832	0.00504784	0.278729	-4.22514
FZD8	-0.110518	0.55684	-5.22604	0.00505632	0.278793	-4.22716
ELAVL1	-0.156614	3.90975	-5.22305	0.00506749	0.278867	-4.2298
CYP51A1	-0.144632	5.41104	-5.22176	0.0050723	0.278867	-4.23094
MMP15	0.312363	4.4691	5.2196	0.00508036	0.278907	-4.23285
LOC105369743	-0.0142316	0.00979301	-5.21575	0.00509478	0.278949	-4.23625
DUSP1	0.55023	5.14673	5.21122	0.00511182	0.278949	-4.24026
TMEM59L	0.473842	1.28634	5.20927	0.00511921	0.278949	-4.24199
ZBED6	-0.459503	3.93967	-5.20802	0.00512393	0.278949	-4.2431
NAV2-AS6	0.10979	0.58301	5.20758	0.00512558	0.278949	-4.24348
RORA	0.123595	0.297937	5.20686	0.0051283	0.278949	-4.24412
ATP6V1A	-0.111071	4.15475	-5.20579	0.00513237	0.278949	-4.24507
SLC17A3	-0.19752	2.48064	-5.19886	0.00515869	0.279404	-4.25121
FOXO4	0.226314	2.53167	5.19674	0.0051668	0.279404	-4.25309
IPO13	-0.108416	3.03605	-5.19515	0.00517284	0.279404	-4.25449
SLC6A16	-0.239842	1.30368	-5.19361	0.00517875	0.279404	-4.25586
CYB5B	-0.147764	5.07029	-5.19258	0.00518268	0.279404	-4.25677
IFI30	-0.220188	7.0271	-5.19204	0.00518475	0.279404	-4.25725
ITPKC	-0.154177	2.21381	-5.18621	0.0052072	0.280218	-4.26244
DCAF6	-0.156223	5.54193	-5.18251	0.00522145	0.280258	-4.26571
LOC107985293	0.108953	0.0544766	5.1808	0.00522808	0.280258	-4.26724
USB1	0.260022	5.67254	5.1803	0.00523001	0.280258	-4.26768
GRAMD1C	0.156539	1.56308	5.16962	0.0052716	0.28209	-4.27718
TRIM62	-0.225169	1.54674	-5.16771	0.00527907	0.282094	-4.27888
DSCC1	-0.17882	3.6464	-5.16366	0.00529498	0.282547	-4.28249
LOC105376042	0.0199782	0.0154282	5.15567	0.0053265	0.282928	-4.28961
CXCL3	0.836271	2.8577	5.15407	0.00533284	0.282928	-4.29103
PKDCC	-0.229357	1.89927	-5.15311	0.00533668	0.282928	-4.2919
WASF3	0.137118	2.44012	5.15305	0.0053369	0.282928	-4.29195
RIBC2	-0.207084	4.00282	-5.15246	0.00533924	0.282928	-4.29247
FRMD8	0.18939	3.26653	5.14728	0.00535987	0.283254	-4.2971
LOC124901740	0.0594554	0.134748	5.14468	0.00537027	0.283254	-4.29942
PTH1R	-0.227393	0.379855	-5.14313	0.00537646	0.283254	-4.3008
RSPRY1	-0.100119	3.80249	-5.14256	0.00537875	0.283254	-4.30131
KCNH1	0.500205	2.77061	5.13991	0.00538939	0.283254	-4.30368
UPB1	-0.194135	2.46211	-5.13976	0.00539	0.283254	-4.30382
STMN3	0.170928	2.6945	5.13717	0.00540039	0.283298	-4.30613
CRBN	0.175657	3.00483	5.13556	0.0054069	0.283298	-4.30757
LOC100289511	0.369348	0.635876	5.13401	0.00541315	0.283298	-4.30896
PSAT1	-0.319496	4.77986	-5.13104	0.00542514	0.283536	-4.31161
LINC02742	0.0520398	0.0260199	5.12551	0.0054476	0.28389	-4.31657
FUT8-AS1	0.100973	0.168014	5.12452	0.00545164	0.28389	-4.31746
CATIP-AS2	0.158529	0.202143	5.12387	0.00545427	0.28389	-4.31803
LOC107986650	0.0657823	0.0503061	5.11847	0.00547635	0.28455	-4.32288
MARCHF9	-0.164871	3.2897	-5.11454	0.00549247	0.28455	-4.3264
B3GALNT2	-0.152077	3.53896	-5.11387	0.00549519	0.28455	-4.32699
LOC105374775	0.0820523	0.228585	5.11348	0.00549683	0.28455	-4.32735
KIF21A	-0.13497	3.23794	-5.10471	0.00553302	0.2856	-4.33522
S100A6	0.153613	10.6368	5.10171	0.00554547	0.2856	-4.33791
LGALS3BP	-0.129717	6.30996	-5.10147	0.00554647	0.2856	-4.33813
LOC124903212	0.140248	0.0847227	5.09961	0.00555421	0.2856	-4.3398
RNF180	0.0132271	0.0101946	5.09952	0.00555459	0.2856	-4.33988
F3	-0.372742	3.91754	-5.09404	0.00557746	0.28639	-4.34481
ATP2B1	-0.194869	4.53894	-5.08352	0.0056217	0.288002	-4.35428
PHLDA1	0.223673	5.79454	5.08298	0.00562398	0.288002	-4.35476
EXOC3L4	0.13198	0.260826	5.07873	0.00564199	0.288318	-4.3586
LOC124909434	0.0557378	0.147223	5.07796	0.00564529	0.288318	-4.35929
PGAM5	-0.119438	4.36437	-5.07289	0.00566686	0.288834	-4.36387
ATRIP-TREX1	0.912568	0.673987	5.07202	0.00567055	0.288834	-4.36465
LOC124902108	-0.0556435	0.0377339	-5.0672	0.00569121	0.289207	-4.369
FANCM	-0.146353	1.16198	-5.06538	0.00569901	0.289207	-4.37065
LOC105369666	0.0549467	0.0274733	5.065	0.00570063	0.289207	-4.37099
SRPX2	0.126978	1.22731	5.0552	0.00574293	0.290965	-4.37984
ZNF738	-0.220349	2.84487	-5.03585	0.00582757	0.294438	-4.39737
ATP6V0D1-DT	-0.163322	0.96515	-5.03048	0.00585131	0.294438	-4.40224
TM2D1	0.175705	4.6275	5.03015	0.00585276	0.294438	-4.40254
DENND3	0.217923	3.93266	5.03008	0.00585309	0.294438	-4.40261
N6AMT1	-0.219488	1.46666	-5.02858	0.00585973	0.294438	-4.40397
UNKL	-0.214815	1.57062	-5.02644	0.00586926	0.294438	-4.40591
SNRPD2	-0.136083	7.28772	-5.02581	0.00587203	0.294438	-4.40648
PRDX4	-0.17508	6.58009	-5.0218	0.00588995	0.294438	-4.41013
LOC105377276	-0.35103	1.86341	-5.02086	0.00589412	0.294438	-4.41098
LAMA5-AS1	-0.113944	0.0692587	-5.01937	0.0059008	0.294438	-4.41233
PANK1	-0.244515	3.07902	-5.0179	0.0059074	0.294438	-4.41367
METAP2	0.0837713	4.49037	5.01786	0.00590755	0.294438	-4.4137
DCLK1	-0.105982	1.56089	-5.01688	0.00591195	0.294438	-4.41459
C10orf95	-0.15642	0.619423	-5.01466	0.00592195	0.294551	-4.41662
LOC124904786	-0.0802129	1.33546	-5.00988	0.00594346	0.29468	-4.42096
DHRS9	-0.887565	1.77448	-5.00988	0.0059435	0.29468	-4.42097
ZNF234	-0.156211	1.29722	-5.00894	0.00594773	0.29468	-4.42182
NFKBIZ	0.229784	6.96469	5.00611	0.00596057	0.294695	-4.4244
CYTH4	0.0686948	0.163772	5.00419	0.00596925	0.294695	-4.42615
SLC16A2	-0.178385	3.52638	-5.00375	0.00597126	0.294695	-4.42655
CCZ1B	-0.0877235	4.44435	-4.99688	0.00600255	0.295857	-4.43281
XIAP	0.0754128	3.84332	4.99463	0.00601285	0.295981	-4.43486
LOC102724951	-0.225748	1.04093	-4.98711	0.0060474	0.296935	-4.44172
CD47	0.198832	4.14171	4.98703	0.0060478	0.296935	-4.4418
LOC105375914	0.384849	2.12525	4.98324	0.00606531	0.297411	-4.44526
C1orf116	-0.238359	1.13608	-4.97904	0.00608479	0.297983	-4.4491
ZC3H12A	0.627772	4.80781	4.97131	0.00612081	0.29936	-4.45617
CCAR1	-0.197446	4.52282	-4.96941	0.00612969	0.29936	-4.4579
TFIP11-DT	0.0809226	1.15586	4.96796	0.00613649	0.29936	-4.45923
CAPN1	-0.16387	4.75509	-4.96467	0.00615198	0.299732	-4.46225
BIN1	-0.0956283	5.88783	-4.95814	0.00618283	0.300567	-4.46824
PPP1R35	-0.332781	4.17254	-4.9577	0.0061849	0.300567	-4.46864
FARSB	0.0817896	2.5207	4.9536	0.00620434	0.300611	-4.4724
HSP90AA1	-0.157443	7.79656	-4.95293	0.00620751	0.300611	-4.47301
GAB2	0.277618	1.82763	4.95252	0.00620947	0.300611	-4.47339
SHISA2	0.137728	0.50852	4.94924	0.00622514	0.300987	-4.4764
LOC124900605	0.494987	3.65967	4.93941	0.00627227	0.302882	-4.48543
ZNF433-AS1	-0.221696	2.08624	-4.92506	0.00634185	0.305445	-4.49863
INSYN2B	0.226485	1.25543	4.92419	0.00634614	0.305445	-4.49944
DACH1	-0.0943893	0.63222	-4.92352	0.0063494	0.305445	-4.50006
PDZD11	-0.0677442	5.3424	-4.91802	0.00637636	0.305974	-4.50513
REX1BD	-0.336693	3.85721	-4.918	0.00637646	0.305974	-4.50514
PPA1	0.0710237	6.46553	4.91406	0.00639583	0.306227	-4.50877
TDRKH-AS1	-0.222518	0.816095	-4.91284	0.00640188	0.306227	-4.5099
CXXC4	-0.176929	0.934943	-4.91192	0.00640639	0.306227	-4.51075
BAK1	-0.141593	4.40644	-4.91041	0.00641389	0.306227	-4.51215
MTERF4	-0.0967798	2.8104	-4.90708	0.00643036	0.306629	-4.51522
SHC2	0.201926	1.9424	4.90458	0.00644281	0.306839	-4.51753
PKM	-0.149347	9.5326	-4.9017	0.00645714	0.307138	-4.52019
ACTR1A	-0.0772081	5.26894	-4.89993	0.00646599	0.307175	-4.52183
LOC124903816	0.00891226	0.00923411	4.89651	0.00648311	0.307261	-4.52499
BEX5	0.129165	0.0861411	4.89285	0.00650146	0.307261	-4.52837
CIRBP	0.36431	4.93966	4.89266	0.00650242	0.307261	-4.52855
FAM171A2	-0.168266	2.57297	-4.89144	0.00650857	0.307261	-4.52968
WNT7B	0.199399	4.03298	4.89139	0.00650884	0.307261	-4.52973
LOC124903530	-0.0222961	0.0308376	-4.88452	0.00654353	0.307261	-4.53609
DLC1	0.211084	2.71735	4.88347	0.00654887	0.307261	-4.53706
SLC51A	-0.121275	0.102561	-4.88219	0.00655537	0.307261	-4.53825
LOC105378550	-0.207935	1.01312	-4.88105	0.00656117	0.307261	-4.53931
PIK3C2B	-0.138796	1.9377	-4.88105	0.00656118	0.307261	-4.53931
TRABD2A	-0.152521	3.47793	-4.87902	0.00657148	0.307261	-4.54118
CFAP161	0.0547562	0.0356981	4.875	0.00659201	0.307261	-4.54492
IL1RAP	0.261685	3.53044	4.86924	0.00662156	0.307261	-4.55026
KLF6	0.372316	4.71668	4.86697	0.0066332	0.307261	-4.55236
LOC124905391	0.0184148	0.0482612	4.86569	0.00663979	0.307261	-4.55355
SLC44A4	-0.0920551	0.707605	-4.8645	0.00664595	0.307261	-4.55466
SIK1	0.602643	3.32009	4.86383	0.00664943	0.307261	-4.55529
MAML3	-0.0427045	0.0448198	-4.85753	0.00668205	0.307261	-4.56114
PRKAG2	0.123691	3.88454	4.8575	0.0066822	0.307261	-4.56117
TIMM17A	-0.113648	5.17539	-4.85689	0.00668539	0.307261	-4.56174
LOC124905369	0.0185721	0.0488173	4.85547	0.00669277	0.307261	-4.56306
XRCC6	-0.0628639	7.72902	-4.85526	0.00669385	0.307261	-4.56325
TUFM	-0.0708593	5.79135	-4.85375	0.00670176	0.307261	-4.56466
BCL10-AS1	0.463197	0.645179	4.85259	0.00670777	0.307261	-4.56573
NPR2	-0.129876	0.534613	-4.85184	0.00671172	0.307261	-4.56644
HLA-A	-0.182374	9.43255	-4.85141	0.00671396	0.307261	-4.56684
UTP14A	0.16976	3.60993	4.85129	0.00671459	0.307261	-4.56695
ANXA6	-0.17883	5.09838	-4.85085	0.0067169	0.307261	-4.56736
SLC25A4	-0.10089	2.44308	-4.85042	0.00671913	0.307261	-4.56776
FIGNL2	-0.213702	1.45387	-4.84946	0.00672417	0.307261	-4.56865
ERRFI1	0.192051	4.64181	4.84892	0.00672699	0.307261	-4.56916
LOC124905527	-0.181583	1.30193	-4.84705	0.00673681	0.307261	-4.5709
TMEM165	0.102121	5.53357	4.84685	0.00673783	0.307261	-4.57108
MT1F	0.523228	4.89702	4.84536	0.00674569	0.307261	-4.57247
MATN4	0.0327975	0.0288963	4.84453	0.00675006	0.307261	-4.57325
STX6	-0.0633821	3.68732	-4.83558	0.00679731	0.309042	-4.58159
RPL31	0.137615	9.05049	4.83242	0.00681411	0.309083	-4.58454
PTGES2	0.269501	5.47628	4.83122	0.0068205	0.309083	-4.58566
LOC124900751	-0.0243659	0.0132482	-4.83029	0.00682545	0.309083	-4.58653
UNK	-0.07411	3.13404	-4.82931	0.00683064	0.309083	-4.58744
NIP7	0.214343	4.14617	4.81578	0.00690329	0.311866	-4.60008
SRD5A1	0.139346	2.237	4.81377	0.00691419	0.311866	-4.60197
NEU1	-0.125519	5.90946	-4.81214	0.00692304	0.311866	-4.6035
IDH1	-0.309254	5.03488	-4.81179	0.00692491	0.311866	-4.60382
DUSP3	0.211942	4.53316	4.80591	0.00695692	0.312862	-4.60933
ASS1	0.280886	6.12534	4.80471	0.00696344	0.312862	-4.61045
CCDC177	0.0582617	0.439281	4.80278	0.00697396	0.312966	-4.61226
RAB26	-0.196292	2.73102	-4.80046	0.00698671	0.313002	-4.61444
ACVR2B-AS1	0.150861	0.513633	4.79802	0.0070001	0.313002	-4.61673
HSPA4L	-0.196124	2.35597	-4.79678	0.00700688	0.313002	-4.61788
RAMP2-AS1	0.111214	0.398934	4.79484	0.00701759	0.313002	-4.61971
SZRD1	0.0374772	5.73532	4.7941	0.00702167	0.313002	-4.6204
H4C14	0.286465	1.28844	4.79358	0.00702454	0.313002	-4.62089
LOC100129098	0.161231	0.153444	4.79217	0.00703229	0.313002	-4.62221
NPR1	-0.241959	5.08991	-4.78943	0.00704745	0.313312	-4.62478
XXYLT1	-0.149393	3.45755	-4.78551	0.00706924	0.313603	-4.62847
UTP25	0.222875	2.84766	4.78486	0.00707284	0.313603	-4.62908
LOC105369484	0.207327	0.166433	4.78334	0.00708131	0.313603	-4.63051
NABP1	0.276376	5.3113	4.78233	0.00708694	0.313603	-4.63146
MTFP1	-0.269657	5.0562	-4.78028	0.00709839	0.313695	-4.63339
ROR1	0.289626	2.52731	4.77771	0.00711274	0.313695	-4.6358
CEBPD	-0.32314	6.88428	-4.77677	0.00711799	0.313695	-4.63668
C11orf71	0.0826502	1.35518	4.77552	0.00712501	0.313695	-4.63786
GOLGA8K	-0.0838718	0.606009	-4.77148	0.00714771	0.313695	-4.64166
PAF1	-0.0867174	4.25529	-4.77129	0.00714878	0.313695	-4.64184
EEF1B2	0.13144	7.70805	4.77043	0.00715363	0.313695	-4.64265
KREMEN1	0.20252	2.61197	4.76935	0.00715976	0.313695	-4.64367
ABHD8	-0.158395	3.20614	-4.76654	0.00717562	0.313695	-4.64632
MRPS16	-0.0684867	5.25038	-4.76382	0.00719103	0.313695	-4.64888
RSRC2	-0.226493	4.11598	-4.7625	0.0071985	0.313695	-4.65012
SPP1	-0.22616	10.1083	-4.7614	0.0072048	0.313695	-4.65116
LTBP2	0.410984	3.19656	4.76091	0.00720756	0.313695	-4.65162
PTPRA	0.0595888	4.82878	4.75974	0.00721422	0.313695	-4.65272
CRIM1-DT	0.292073	3.8501	4.75902	0.00721832	0.313695	-4.6534
ADAMTS12	0.45231	3.62479	4.7586	0.00722075	0.313695	-4.65381
LOC101929727	0.0161113	0.00805563	4.755	0.00724131	0.314069	-4.6572
VEPH1	-0.194798	2.94306	-4.7542	0.00724584	0.314069	-4.65795
RIPK2	-0.106313	4.71872	-4.75163	0.00726057	0.31435	-4.66037
SPAG16	0.103275	3.59103	4.74812	0.00728077	0.314457	-4.66369
TARS3	-0.121003	1.40287	-4.74801	0.00728144	0.314457	-4.6638
LOC124905401	0.0245886	0.0476848	4.7469	0.00728782	0.314457	-4.66485
ETS1	0.335914	3.84364	4.74488	0.00729946	0.314603	-4.66675
ABHD15	-0.149613	2.29599	-4.74343	0.00730785	0.314609	-4.66813
ZNF221	-0.0974019	0.788139	-4.74147	0.00731917	0.314645	-4.66997
ARL6IP6	0.118482	4.34054	4.73933	0.0073316	0.314645	-4.672
ZNF426-DT	0.246258	0.409468	4.73812	0.00733862	0.314645	-4.67314
CCDC50	0.148679	4.20355	4.73644	0.00734838	0.314645	-4.67473
ZNF417	-0.19361	2.32002	-4.73207	0.0073739	0.314645	-4.67887
SOWAHC	0.236869	2.51799	4.73098	0.00738029	0.314645	-4.67991
PHACTR3	-0.0552767	0.200795	-4.73053	0.00738289	0.314645	-4.68033
LOC105377730	0.0226034	0.0144194	4.72972	0.00738768	0.314645	-4.6811
SLC38A5	0.278602	1.63289	4.72952	0.00738884	0.314645	-4.68129
CRYBG1	-0.225716	2.44696	-4.7279	0.00739833	0.314645	-4.68282
SKIL	0.211589	3.79253	4.7277	0.00739953	0.314645	-4.68301
CDADC1	0.216197	1.63908	4.71477	0.00747588	0.317365	-4.69527
HDAC6	0.0521199	3.90903	4.71386	0.00748127	0.317365	-4.69613
LOC124903454	-0.0281813	0.023409	-4.7106	0.00750072	0.317365	-4.69923
HOXA4	-0.335583	2.8639	-4.71021	0.00750304	0.317365	-4.6996
TRMT1L	-0.168466	2.33084	-4.70986	0.00750515	0.317365	-4.69994
LOC124901370	0.0240523	0.0259217	4.7058	0.00752943	0.318039	-4.70379
TSC22D1	-0.216755	5.46468	-4.70355	0.0075429	0.318067	-4.70593
CSRP1	0.126193	5.9251	4.70186	0.00755306	0.318067	-4.70753
SNTB2	-0.182814	2.61029	-4.70012	0.00756358	0.318067	-4.7092
RNF8	-0.060813	2.35952	-4.69968	0.00756622	0.318067	-4.70961
ZNF275	0.217656	1.94793	4.69875	0.00757184	0.318067	-4.7105
COX5A	-0.18363	5.35683	-4.69715	0.00758148	0.318112	-4.71202
FAM81A	-0.161062	2.39247	-4.69581	0.0075896	0.318112	-4.71329
DUSP2	0.677161	2.01318	4.69429	0.00759881	0.318148	-4.71474
EXOSC4	-0.263751	3.52896	-4.686	0.00764924	0.319391	-4.72264
LOC124902686	-0.129482	0.673745	-4.68564	0.00765142	0.319391	-4.72298
LOC124904437	0.162576	0.349167	4.68528	0.00765364	0.319391	-4.72332
LOC124904950	0.333361	1.32036	4.6827	0.00766943	0.319592	-4.72578
IGIP	-0.14145	1.36944	-4.68175	0.00767524	0.319592	-4.72669
CAMLG	0.132161	3.33379	4.67564	0.00771284	0.320775	-4.73252
TNC	0.25751	4.57278	4.67308	0.00772866	0.320775	-4.73496
BARHL1	-0.0207181	0.0103591	-4.67126	0.0077399	0.320775	-4.7367
IFI16	0.101115	5.69603	4.67028	0.00774595	0.320775	-4.73763
ITGA2	-0.212972	1.73731	-4.66897	0.0077541	0.320775	-4.73888
OMA1	-0.133027	3.04929	-4.66896	0.00775418	0.320775	-4.7389
PERP	0.144511	4.50096	4.66736	0.00776411	0.320799	-4.74042
LOC124902855	0.0291006	0.0657677	4.6646	0.00778131	0.320799	-4.74306
SLC25A26	0.163223	3.45926	4.66436	0.00778277	0.320799	-4.74329
LOC105373974	0.258841	0.524609	4.66346	0.00778842	0.320799	-4.74415
LOC107987209	0.201607	1.38161	4.65005	0.00787264	0.323917	-4.75699
RBMS1	0.18976	4.96018	4.6462	0.00789703	0.324516	-4.76068
CAPN2	0.146842	7.85127	4.64446	0.00790808	0.324516	-4.76234
HAT1	-0.131835	5.71289	-4.64221	0.00792237	0.324516	-4.7645
KLHL41	-0.0391084	0.0798495	-4.64111	0.0079294	0.324516	-4.76556
CCDC77	-0.121703	3.28193	-4.64067	0.00793222	0.324516	-4.76598
ZNF71-SMIM17	0.0915039	0.168634	4.6396	0.00793902	0.324516	-4.767
ZC3HC1	-0.254464	3.5203	-4.63792	0.00794979	0.324516	-4.76862
KDSR	0.162291	3.45686	4.6366	0.00795818	0.324516	-4.76988
ZNF687	0.065325	3.52929	4.63462	0.00797087	0.324516	-4.77178
LOC107985027	-0.0304616	0.0378264	-4.63398	0.00797499	0.324516	-4.77239
ANAPC7	-0.134877	4.35864	-4.63169	0.00798971	0.324516	-4.77459
KATNAL1	0.210173	2.10659	4.63127	0.00799246	0.324516	-4.775
NIBAN2	0.157302	6.42213	4.62988	0.00800139	0.324516	-4.77634
LINC01089	-0.254647	2.57574	-4.6291	0.00800643	0.324516	-4.77709
GAS5	0.203366	8.03599	4.61872	0.00807373	0.326625	-4.78707
LMNA	-0.111203	6.6439	-4.61843	0.00807562	0.326625	-4.78735
SDK1	0.249987	1.35069	4.61644	0.0080886	0.326803	-4.78926
GMEB2	0.0955136	3.17488	4.61509	0.0080974	0.326813	-4.79056
CD81	-0.178824	7.28366	-4.61307	0.00811059	0.326998	-4.7925
LRRC8D	-0.234359	3.19515	-4.61024	0.00812917	0.327143	-4.79523
TNFRSF12A	0.16368	6.49885	4.60894	0.00813772	0.327143	-4.79648
LINC00963	0.193474	3.10483	4.6086	0.00813994	0.327143	-4.79681
LIN54	-0.121411	2.26101	-4.60295	0.00817719	0.327764	-4.80225
GET3	-0.205651	5.51942	-4.60263	0.00817937	0.327764	-4.80257
ZNF765-ZNF761	0.615438	0.442975	4.60235	0.0081812	0.327764	-4.80284
S1PR5	-0.188782	1.87542	-4.58927	0.00826829	0.330905	-4.81546
ZNF226	-0.168985	2.49077	-4.58569	0.00829234	0.331519	-4.81892
FRRS1	-0.128963	0.469951	-4.58126	0.00832222	0.332144	-4.82321
LOC124901982	0.0181054	0.0197132	4.58079	0.0083254	0.332144	-4.82367
LOC102723360	-0.295832	2.35202	-4.57821	0.00834286	0.332283	-4.82616
LOC124905982	0.145213	0.313166	4.57769	0.00834633	0.332283	-4.82666
TXLNG	0.142254	3.31753	4.57386	0.00837235	0.332971	-4.83037
LRCH1	0.0751362	3.64624	4.56695	0.00841955	0.334499	-4.83707
ZBTB42	0.126329	1.72496	4.56306	0.0084462	0.335209	-4.84083
IDI1	-0.187038	5.11158	-4.5588	0.00847556	0.336024	-4.84497
LINC02012	0.109431	0.22538	4.5556	0.00849768	0.33655	-4.84807
TMEM192	0.0638015	2.35395	4.55123	0.00852805	0.336792	-4.85233
DDX5	0.125156	6.5473	4.54749	0.00855411	0.336792	-4.85596
FRG2C	0.0334886	0.0238716	4.547	0.00855752	0.336792	-4.85644
GEN1	-0.163119	1.97505	-4.54655	0.00856062	0.336792	-4.85687
TMEM181	0.159745	4.23743	4.54623	0.00856288	0.336792	-4.85718
ZNF710-AS1	-0.134701	0.369167	-4.54535	0.00856907	0.336792	-4.85804
RIOK1	0.161811	2.37503	4.5421	0.00859183	0.336792	-4.8612
PLAT	0.226765	2.14994	4.54078	0.00860104	0.336792	-4.86248
STRADB	-0.216854	4.32301	-4.5382	0.00861923	0.336792	-4.865
EPB41L4A	0.150067	1.48863	4.5379	0.00862132	0.336792	-4.86528
LOC112268458	-0.133631	0.979857	-4.53753	0.00862391	0.336792	-4.86564
KCNJ13	-0.452459	1.6024	-4.53746	0.00862441	0.336792	-4.86571
RPL4	0.0538804	8.42896	4.53554	0.00863795	0.336792	-4.86758
PNPLA3	-0.217435	3.1851	-4.5353	0.00863967	0.336792	-4.86782
LDAH	-0.162041	2.9406	-4.53455	0.00864496	0.336792	-4.86855
GINS1	-0.135664	4.4304	-4.53348	0.00865258	0.336792	-4.8696
LOC105378542	-0.229146	0.636557	-4.53318	0.00865464	0.336792	-4.86988
ZFP64	-0.127534	3.71414	-4.53146	0.00866685	0.336792	-4.87156
FXR2	-0.0952368	3.8715	-4.53012	0.00867633	0.336792	-4.87286
BTG1	-0.129999	3.49853	-4.52952	0.00868058	0.336792	-4.87345
LINC00641	0.216048	2.02141	4.52677	0.00870016	0.337154	-4.87613
SAP30	-0.370043	3.75535	-4.5248	0.00871422	0.337154	-4.87805
SPI1	-0.0314164	0.025814	-4.52396	0.00872023	0.337154	-4.87887
CLK4	-0.314128	2.06604	-4.52111	0.00874058	0.337154	-4.88165
ARHGEF2	-0.101843	3.58574	-4.5206	0.00874426	0.337154	-4.88215
C10orf126	-0.157497	0.239598	-4.5203	0.00874642	0.337154	-4.88245
C5orf60	0.0609041	0.030452	4.51954	0.00875185	0.337154	-4.88318
PDCD7	-0.149872	3.0903	-4.5142	0.00879025	0.338291	-4.8884
TBX1	-0.0476508	0.109685	-4.5113	0.0088112	0.338755	-4.89123
LOC107985029	-0.126905	0.258096	-4.50826	0.00883319	0.339259	-4.8942
ZNF550	-0.15194	2.58775	-4.50369	0.00886644	0.340193	-4.89868
PDE7A	-0.13093	2.29305	-4.50011	0.00889255	0.340781	-4.90218
CDR2	0.136618	5.16317	4.49816	0.00890682	0.340781	-4.90409
INHBA	0.782499	2.54468	4.49791	0.00890861	0.340781	-4.90432
SERINC5	-0.13464	2.97544	-4.49655	0.00891862	0.340822	-4.90566
ADSS2	0.138181	5.11496	4.49445	0.008934	0.340934	-4.90771
TRHDE-AS1	-0.0591624	0.094642	-4.49371	0.00893944	0.340934	-4.90844
PGM1	-0.121254	5.53764	-4.48773	0.00898361	0.341986	-4.91431
ARMH3	-0.0504709	3.30496	-4.48565	0.00899901	0.341986	-4.91635
ZNF496-DT	0.141644	2.12751	4.48532	0.00900141	0.341986	-4.91666
TMEM185B	0.0844205	3.26389	4.48422	0.00900958	0.341986	-4.91774
SNIP1	0.176094	2.54157	4.48264	0.00902136	0.341986	-4.9193
MYEOV	0.0191612	0.00958061	4.48027	0.009039	0.341986	-4.92162
LOC124905421	-0.115243	0.593163	-4.47987	0.009042	0.341986	-4.92202
RAD51D	0.0409681	1.9098	4.47804	0.0090556	0.341986	-4.92381
NAXE	-0.125554	5.43235	-4.47704	0.00906311	0.341986	-4.9248
CRADD	0.282613	2.4084	4.47539	0.00907542	0.341986	-4.92641
LOC124905202	0.295703	0.900726	4.47473	0.00908039	0.341986	-4.92706
CYP24A1	0.658962	2.91317	4.47449	0.00908222	0.341986	-4.9273
PDZK1IP1	0.297754	9.19089	4.47343	0.00909017	0.341986	-4.92834
CDH16	-0.238773	3.65256	-4.47309	0.00909271	0.341986	-4.92868
TBC1D1	-0.0697631	3.88904	-4.46879	0.009125	0.342004	-4.9329
KRT7	0.28733	4.2228	4.46785	0.0091321	0.342004	-4.93382
TMEM19	-0.0489391	3.19899	-4.46704	0.00913821	0.342004	-4.93462
EN2	-0.18111	0.525096	-4.46671	0.00914072	0.342004	-4.93494
HMMR-AS1	-0.0540253	0.0630038	-4.46671	0.00914076	0.342004	-4.93495
PRELID1	-0.21743	5.75829	-4.46588	0.00914702	0.342004	-4.93576
HAUS3	-0.134881	2.36129	-4.45642	0.00921882	0.34435	-4.94507
RPL36A	0.250206	9.26151	4.45234	0.00925001	0.345177	-4.94909
XYLT1	0.016461	0.0152677	4.44851	0.00927947	0.345931	-4.95287
GALNS	-0.173728	2.50178	-4.44674	0.0092931	0.345931	-4.95462
SIX5	-0.115157	3.17695	-4.44617	0.00929747	0.345931	-4.95518
AANAT	0.0332603	0.0246614	4.44312	0.00932102	0.34613	-4.95819
NGLY1	-0.185629	3.00402	-4.44259	0.00932512	0.34613	-4.95871
NR2F1	-0.330097	1.97671	-4.44195	0.00933008	0.34613	-4.95934
LARGE2	-0.206158	0.465821	-4.44044	0.00934178	0.346228	-4.96083
SRRT	-0.109641	5.19374	-4.43317	0.00939829	0.346932	-4.96801
BCL2L1	0.152164	6.21048	4.43244	0.00940397	0.346932	-4.96873
WDR11-DT	-0.0513807	0.0326529	-4.43202	0.00940726	0.346932	-4.96914
MRPL10	0.181373	3.30221	4.43109	0.00941454	0.346932	-4.97006
EIF2S3	0.0960063	6.50829	4.42963	0.00942596	0.346932	-4.97151
LOC124900691	0.0185208	0.0666208	4.42958	0.00942637	0.346932	-4.97156
GLIS2	0.181865	3.67911	4.42652	0.00945039	0.346932	-4.97459
MARVELD3	-0.170563	0.567834	-4.42649	0.00945063	0.346932	-4.97462
CENPO	-0.161775	3.57522	-4.42572	0.00945668	0.346932	-4.97538
STAT6	0.070965	5.94951	4.42457	0.00946573	0.346932	-4.97652
PEA15	0.166596	7.03159	4.42128	0.00949167	0.346932	-4.97977
MTARC2	0.0790466	2.75187	4.42105	0.00949354	0.346932	-4.98
LOC105373024	-0.240572	0.415088	-4.42084	0.00949519	0.346932	-4.98021
LOC107986522	-0.051649	0.0746034	-4.42074	0.00949595	0.346932	-4.98031
LOC105376601	0.0457493	0.101186	4.42056	0.00949739	0.346932	-4.98049
SASS6	-0.161095	2.61023	-4.41858	0.00951301	0.34717	-4.98244
SMC4	-0.185059	6.46806	-4.40893	0.00958982	0.349029	-4.992
DACT3	-0.132423	0.324468	-4.40813	0.00959622	0.349029	-4.9928
UBAP2	0.100408	4.36149	4.4081	0.00959649	0.349029	-4.99283
FANCE	0.101511	2.4915	4.40759	0.00960057	0.349029	-4.99334
LOC124901759	0.0788619	0.393952	4.40204	0.00964513	0.349461	-4.99884
HCFC1R1	0.220099	5.34358	4.40179	0.00964714	0.349461	-4.99909
RBBP7	-0.0973432	7.13038	-4.40163	0.00964843	0.349461	-4.99925
FAM9B	-0.0402955	0.0250734	-4.40154	0.00964916	0.349461	-4.99934
MMP24	0.1729	4.64631	4.39984	0.00966283	0.349484	-5.00102
ADAMTS14	0.0142414	0.01127	4.39919	0.00966813	0.349484	-5.00168
MUC13	-0.0170315	0.00851575	-4.39383	0.00971149	0.350718	-5.007
FBXL19	-0.199983	3.31718	-4.3921	0.00972554	0.350776	-5.00872
STIP1	-0.134972	6.11114	-4.39137	0.00973151	0.350776	-5.00945
CCNL1	0.259953	6.14569	4.39003	0.00974244	0.350838	-5.01078
CCDC91	0.109614	2.97487	4.38886	0.00975198	0.35085	-5.01194
CNNM4	0.104083	2.00966	4.38197	0.00980837	0.352218	-5.0188
BOK	0.236989	4.24488	4.38195	0.00980849	0.352218	-5.01881
PDCD5	0.146622	5.72847	4.38031	0.00982201	0.352346	-5.02045
TNFAIP2	0.324314	5.47471	4.37927	0.00983054	0.352346	-5.02148
ENO1	-0.220093	10.4347	-4.37654	0.0098531	0.352822	-5.02421
DDX58	-0.179789	2.62808	-4.3721	0.00988982	0.353436	-5.02863
UTP15	0.131341	1.6234	4.37011	0.00990638	0.353436	-5.03062
LOC124904496	0.0308135	0.0154067	4.36794	0.00992442	0.353436	-5.03278
NXT1-AS1	0.184919	0.182413	4.36735	0.00992933	0.353436	-5.03337
DDX23	-0.10416	5.25172	-4.36711	0.00993132	0.353436	-5.0336
TOB1	-0.242109	3.2017	-4.36558	0.00994412	0.353436	-5.03513
SSBP3-AS1	-0.149366	0.56046	-4.36488	0.00994991	0.353436	-5.03583
FOSL2	0.295848	5.57896	4.36478	0.00995082	0.353436	-5.03594
LOC112268081	-0.0314146	0.0157073	-4.36285	0.00996695	0.353436	-5.03786
RFPL1S	0.13279	0.901676	4.3627	0.00996819	0.353436	-5.03801
IFIT1	-0.259509	1.46467	-4.36221	0.00997228	0.353436	-5.0385
CLSTN1	-0.184801	6.74183	-4.36068	0.00998509	0.353515	-5.04002
C15orf39	0.277537	1.43644	4.35904	0.00999887	0.353515	-5.04166

## Sheet: 1b RI.significant
ID	GeneID	geneSymbol	chr	strand	riExonStart_0base	riExonEnd	upstreamES	upstreamEE	downstreamES	downstreamEE	ID	IJC_SAMPLE_1	SJC_SAMPLE_1	IJC_SAMPLE_2	SJC_SAMPLE_2	IncFormLen	SkipFormLen	PValue	FDR	IncLevel1	IncLevel2	IncLevelDifference
3052	LOC124900691	124900691	NC_000004.12	-	37455479	37475850	37455479	37455590	37456635	37475850	3052	0,3,2	2,2,3	1,14,8	2,0,0	1194	149	0.00109745	0.0282445	0.0,0.158,0.077	0.059,1.0,1.0	-0.608
4478	ZNF782	158431	NC_000009.12	-	96852852	96854514	96852852	96853069	96854087	96854514	4478	12,10,17	5,9,2	6,54,47	0,0,3	1167	149	3.36e-06	0.000702915	0.235,0.124,0.52	1.0,1.0,0.667	-0.596
6153	ZNF248	57209	NC_000010.11	-	37801515	37803943	37801515	37803692	37803832	37803943	6153	4,3,1	8,4,8	5,14,17	0,8,8	289	149	0.00119285	0.0299479	0.205,0.279,0.061	1.0,0.474,0.523	-0.484
119	FAM156A	29057	NC_000023.11	-	52956272	52958571	52956272	52956346	52957087	52958571	119	1,2,3	1,0,2	3,6,15	0,0,1	890	149	0.00161265	0.0370128	0.143,1.0,0.201	1.0,1.0,0.715	-0.457
8975	Novel.14685	NA	NC_000015.10	+	101966069	101972694	101966069	101966223	101972582	101972694	8975	56,40,48	0,3,1	6,76,105	0,0,0	6508	149	0.00166827	0.0378653	1.0,0.234,0.524	1.0,1.0,1.0	-0.414
1141	B3GNTL1	146712	NC_000017.11	-	82942155	82944049	82942155	82943112	82943821	82944049	1141	16,13,19	2,3,1	2,19,26	0,0,0	858	149	1.33e-05	0.0014096	0.581,0.429,0.767	1.0,1.0,1.0	-0.408
6939	ZSCAN23	222696	NC_000006.12	-	28440074	28443491	28440074	28440207	28443398	28443491	6939	41,31,38	3,1,2	6,70,110	0,2,0	3340	149	0.000402571	0.0159756	0.379,0.58,0.459	1.0,0.61,1.0	-0.397
6290	SLC29A2	3177	NC_000011.10	-	66371562	66372265	66371562	66371611	66372009	66372265	6290	3,4,1	2,0,3	4,9,12	0,2,0	547	149	0.00072219	0.0221004	0.29,1.0,0.083	1.0,0.551,1.0	-0.393
2238	WNK4	65266	NC_000017.11	+	42796480	42797066	42796480	42796578	42796685	42797066	2238	0,1,0	5,2,4	3,10,4	1,5,8	256	149	4.77e-06	0.000837416	0.0,0.225,0.0	0.636,0.538,0.225	-0.391
902	LIN7B	64130	NC_000019.10	+	49117854	49118460	49117854	49118087	49118351	49118460	902	13,21,10	5,3,5	19,29,26	0,3,0	413	149	4.85e-05	0.00369624	0.484,0.716,0.419	1.0,0.777,1.0	-0.386
4869	BCKDHB	594	NC_000006.12	+	80462871	80466676	80462871	80463072	80465746	80466676	4869	10,38,19	1,2,3	12,51,43	1,1,0	2823	149	0.00080234	0.0232792	0.345,0.501,0.251	0.388,0.729,1.0	-0.34
3031	TMEM52	339456	NC_000001.11	-	1919044	1919279	1919044	1919088	1919181	1919279	3031	1,3,1	2,4,0	4,2,2	0,1,0	242	149	0.00014508	0.00818703	0.235,0.316,1.0	1.0,0.552,1.0	-0.334
1213	LRRC37A3	374819	NC_000017.11	-	64918749	64919536	64918749	64918870	64919430	64919536	1213	17,20,6	1,0,4	6,32,24	0,0,0	709	149	0.00217373	0.0469145	0.781,1.0,0.24	1.0,1.0,1.0	-0.326
3878	Novel.21655	NA	NW_021160015.1	+	72206	78831	72206	78598	78732	78831	3878	1,0,1	4,6,1	0,7,6	3,2,1	283	149	0.000616669	0.0195522	0.116,0.0,0.345	0.0,0.648,0.76	-0.316
8038	ZNF131	7690	NC_000005.10	+	43121564	43122177	43121564	43121828	43122038	43122177	8038	18,22,21	18,20,22	15,48,57	2,18,23	359	149	0.000999053	0.0264878	0.293,0.313,0.284	0.757,0.525,0.507	-0.3
824	PCSK4	54760	NC_000019.10	-	1486852	1487313	1486852	1487065	1487140	1487313	824	0,1,0	6,6,6	4,7,3	3,8,13	224	149	1.14e-05	0.00131215	0.0,0.1,0.0	0.47,0.368,0.133	-0.29
346	SREBF2	6721	NC_000022.11	+	41878658	41880992	41878658	41878758	41880715	41880992	346	114114124	17,15,15	55325365	3,11,13	2106	149	9.31e-07	0.000230772	0.322,0.35,0.369	0.565,0.676,0.665	-0.288
1702	MTRF1	9617	NC_000013.11	-	41262410	41263681	41262410	41262481	41263274	41263681	1702	33,27,28	1,5,2	8,66,64	0,0,2	942	149	0.000166495	0.00865575	0.839,0.461,0.689	1.0,1.0,0.835	-0.282
9029	MYEF2	50804	NC_000015.10	-	48159612	48162893	48159612	48159804	48162676	48162893	9029	205168237	4,10,7	130409555	1,1,6	3021	149	0.000177224	0.00900915	0.717,0.453,0.625	0.865,0.953,0.82	-0.281
1579	ITGB1BP1	9270	NC_000002.12	-	9405680	9406905	9405680	9406190	9406362	9406905	1579	19,35,23	3,8,3	34,43,26	0,0,0	321	149	1.57e-08	9.64e-06	0.746,0.67,0.781	1.0,1.0,1.0	-0.268
5241	PRPF40A	55660	NC_000002.12	-	152717355	152718446	152717355	152717625	152717830	152718446	5241	18,17,20	11,19,13	17,74,61	5,20,12	354	149	7.96e-05	0.00520956	0.408,0.274,0.393	0.589,0.609,0.681	-0.268
6735	CTSB	1508	NC_000008.11	-	11842523	11845222	11842523	11842688	11844018	11845222	6735	31,33,28	1,4,0	63,71,62	0,0,0	1479	149	0.00237412	0.0496707	0.757,0.454,1.0	1.0,1.0,1.0	-0.263
554	MTG2	26164	NC_000020.11	+	62188789	62193624	62188789	62188805	62193415	62193624	554	115101111	3,3,0	67319365	0,1,1	4759	149	0.00071709	0.0220541	0.545,0.513,1.0	1.0,0.909,0.92	-0.257
8191	KRT7	3855	NC_000012.12	+	52232640	52233620	52232640	52232791	52232922	52233620	8191	13,5,18	1,3,3	12,22,13	0,0,1	280	149	5.45e-05	0.00398843	0.874,0.47,0.761	1.0,1.0,0.874	-0.256
1937	LINC00472	79940	NC_000006.12	-	71417319	71421836	71417319	71417443	71420065	71421836	1937	144108134	26,23,20	69488429	3,24,37	2771	149	1.41e-05	0.00146816	0.229,0.202,0.265	0.553,0.522,0.384	-0.254
657	ZNF160	90338	NC_000019.10	-	53085162	53086321	53085162	53085218	53085808	53086321	657	41,38,33	5,1,4	11,66,97	0,0,3	739	149	0.000690295	0.0214445	0.623,0.885,0.625	1.0,1.0,0.867	-0.245
1432	ZNF577	84765	NC_000019.10	-	51886820	51887951	51886820	51886912	51887895	51887951	1432	70,36,66	4,2,2	53109103	0,0,1	1132	149	2.65e-05	0.00232939	0.697,0.703,0.813	1.0,1.0,0.931	-0.239
1936	LINC00472	79940	NC_000006.12	-	71417319	71421836	71417319	71417392	71420065	71421836	1936	155119151	13,17,16	71508461	2,22,24	2822	149	0.000760213	0.0228101	0.386,0.27,0.333	0.652,0.549,0.504	-0.239
5360	STEAP3	55240	NC_000002.12	+	119223833	119231034	119223833	119223888	119230739	119231034	5360	234182220	2,2,1	25431473	0,0,1	7000	149	0.00189117	0.0421471	0.714,0.66,0.824	1.0,1.0,0.91	-0.237
7517	RNF146	81847	NC_000006.12	+	127280230	127285348	127280230	127280340	127282286	127285348	7517	184178226	8,4,6	48488546	0,6,2	2095	149	0.000489127	0.0169979	0.621,0.76,0.728	1.0,0.853,0.951	-0.232
686	TEAD2	8463	NC_000019.10	-	49359843	49362175	49359843	49360081	49361395	49362175	686	38,65,28	4,2,0	21127100	0,1,0	1463	149	0.000467901	0.0167873	0.492,0.768,1.0	1.0,0.928,1.0	-0.223
2443	ELOVL1	64834	NC_000001.11	-	43366267	43368142	43366267	43366411	43367914	43368142	2443	87,77,66	3,4,1	29163158	0,0,2	1652	149	0.000183157	0.00923443	0.723,0.635,0.856	1.0,1.0,0.877	-0.221
898	RCN3	57333	NC_000019.10	+	49526009	49526565	49526009	49526423	49526509	49526565	898	6,5,10	0,2,4	6,11,7	0,1,0	235	149	0.0009949	0.0264878	1.0,0.613,0.613	1.0,0.875,1.0	-0.216
2611	LOC124900660	124900660	NC_000004.12	+	9659024	9671347	9659024	9664720	9666428	9671347	2611	59,48,79	1,1,8	45124136	1,0,1	1857	149	0.000108124	0.00639489	0.826,0.794,0.442	0.783,1.0,0.916	-0.212
1590	SLC35B3	51000	NC_000006.12	-	8429863	8435567	8429863	8430157	8435076	8435567	1590	383362438	6,2,4	139796874	0,3,0	5068	149	9.23e-05	0.00573187	0.652,0.842,0.763	1.0,0.886,1.0	-0.21
7542	LETM2	137994	NC_000008.11	+	38392541	38394241	38392541	38392995	38394097	38394241	7542	169133208	8,8,21	172260231	4,9,2	1251	149	0.000501798	0.0172433	0.716,0.664,0.541	0.837,0.775,0.932	-0.208
1280	LOC105376689	105376689	NC_000001.11	-	7702381	7704690	7702381	7703230	7703347	7704690	1280	3,2,3	27,19,27	4,13,23	5,32,30	266	149	3.87e-06	0.000743869	0.059,0.056,0.059	0.309,0.185,0.3	-0.207
667	ZNF160	90338	NC_000019.10	-	53091412	53091720	53091412	53091529	53091636	53091720	667	4,3,8	9,17,15	4,16,26	5,16,18	256	149	0.0014975	0.0350485	0.206,0.093,0.237	0.318,0.368,0.457	-0.202
8529	LOC124905468	124905468	NW_021160013.1	-	150995	152811	150995	151093	152719	152811	8529	2,4,4	1,0,1	2,0,8	0,1,0	1775	149	0.00131168	0.0313936	0.144,1.0,0.251	1.0,0.0,1.0	-0.202
3181	PRMT7	54496	NC_000016.10	+	68357053	68357967	68357053	68357202	68357770	68357967	3181	65,42,33	1,1,5	65,87,55	0,0,0	717	149	0.000246953	0.0116847	0.931,0.897,0.578	1.0,1.0,1.0	-0.198
4476	ZNF782	158431	NC_000009.12	-	96851946	96854514	96851946	96852005	96854087	96854514	4476	27,27,41	9,8,8	8,87,77	1,8,7	2231	149	0.00228567	0.0486183	0.167,0.184,0.255	0.348,0.421,0.424	-0.196
8477	LOC105369787	105369787	NC_000012.12	-	58328380	58330494	58328380	58328520	58330276	58330494	8477	331310398	0,0,42	332651718	0,0,0	1905	149	0.00054748	0.0178985	1.0,1.0,0.426	1.0,1.0,1.0	-0.191
1517	YBX2	51087	NC_000017.11	-	7291092	7294639	7291092	7291182	7291531	7294639	1517	0,0,2	4,13,4	3,10,5	4,5,9	498	149	1.19e-05	0.00132558	0.0,0.0,0.13	0.183,0.374,0.143	-0.19
4535	MTHFR	4524	NC_000001.11	-	11802880	11806138	11802880	11803129	11805887	11806138	4535	107103107	1,1,4	62207231	0,1,1	2907	149	0.0022922	0.0486183	0.846,0.841,0.578	1.0,0.914,0.922	-0.19
7848	KRTCAP2	200185	NC_000001.11	-	155173316	155173834	155173316	155173474	155173738	155173834	7848	25,16,13	0,2,4	20,16,30	0,0,2	413	149	0.00147433	0.0347456	1.0,0.743,0.54	1.0,1.0,0.844	-0.187
7361	SETD4	54093	NC_000021.9	-	36034540	36036251	36034540	36035960	36036084	36036251	7361	16,11,14	41,33,49	19,26,41	14,35,53	273	149	0.000210999	0.0102193	0.176,0.154,0.135	0.426,0.288,0.297	-0.182
9310	CCDC78	124093	NC_000016.10	-	722581	723018	722581	722789	722921	723018	9310	0,0,0	2,12,11	4,2,6	8,14,9	281	149	8.05e-06	0.00110628	0.0,0.0,0.0	0.21,0.07,0.261	-0.18
4375	KIFC3	3801	NC_000016.10	-	57772222	57776690	57772222	57772288	57776485	57776690	4375	563624736	14,7,19	47126952378	7,15,14	4346	149	0.000478001	0.0168011	0.58,0.753,0.57	0.698,0.86,0.853	-0.169
9078	SIN3A	25942	NC_000015.10	-	75360089	75361191	75360089	75360211	75360564	75361191	9078	20,29,23	34,29,33	28,88,101	11,54,74	502	149	0.000533497	0.0176427	0.149,0.229,0.171	0.43,0.326,0.288	-0.165
4132	PDZK1IP1	10158	NC_000001.11	-	47189865	47191372	47189865	47190012	47191235	47191372	4132	191315242117	28,53,56	212639823951	0,32,0	1372	149	0	0	0.881,0.757,0.804	1.0,0.931,1.0	-0.163
1476	USE1	55850	NC_000019.10	+	17211646	17213286	17211646	17211774	17211894	17213286	1476	85,90,48	44,45,35	79172111	25,37,40	269	149	0.000579545	0.0186638	0.517,0.526,0.432	0.636,0.72,0.606	-0.162
4005	PTP4A2	8073	NC_000001.11	-	31906420	31908960	31906420	31908131	31908186	31908960	4005	15,17,13	0,0,9	10,34,27	0,0,0	204	149	0.00184884	0.0415044	1.0,1.0,0.513	1.0,1.0,1.0	-0.162
983	YJEFN3	374887	NC_000019.10	+	19535528	19537703	19535528	19535679	19537318	19537703	983	109,83,126	29,25,24	158230226	20,27,25	1788	149	0.000151562	0.00825009	0.239,0.217,0.304	0.397,0.415,0.43	-0.161
1033	RAB11B	9230	NC_000019.10	+	8402484	8404436	8402484	8402565	8403435	8404436	1033	128100127	0,0,17	136263301	0,0,0	1019	149	0.000189375	0.00939394	1.0,1.0,0.522	1.0,1.0,1.0	-0.159
2049	KIF18B	146909	NC_000017.11	-	44924710	44926499	44924710	44926186	44926413	44926499	2049	140130168	35,31,37	93331294	12,49,18	376	149	0.000135618	0.00779612	0.613,0.624,0.643	0.754,0.728,0.866	-0.156
8526	ALKBH2	121642	NC_000012.12	-	109092506	109093645	109092506	109092937	109093246	109093645	8526	68,34,55	57,66,62	67,121,90	36,55,62	458	149	5.33e-05	0.00394792	0.28,0.144,0.224	0.377,0.417,0.321	-0.156
4368	PRPF38B	55119	NC_000001.11	+	108696276	108698017	108696276	108696337	108697946	108698017	4368	428347479	13,17,17	246924985	3,20,13	1758	149	0.000801668	0.0232792	0.736,0.634,0.705	0.874,0.797,0.865	-0.154
9551	PRR11	55771	NC_000017.11	+	59201562	59207628	59201562	59204957	59206295	59207628	9551	442382376	12,17,14	455626457	15,4,1	1487	149	0.0007295	0.0222136	0.787,0.692,0.729	0.752,0.94,0.979	-0.154
6678	WSB1	26118	NC_000017.11	+	27307743	27309272	27307743	27307919	27309099	27309272	6678	543426737	22,10,24	39410091043	3,2,17	1329	149	3.85e-07	0.000118278	0.735,0.827,0.775	0.936,0.983,0.873	-0.152
6200	LOC90246	90246	NC_000003.12	+	128496698	128511221	128496698	128502861	128503439	128511221	6200	84,65,103	5,1,4	97147121	0,0,0	727	149	4.31e-06	0.000802907	0.775,0.93,0.841	1.0,1.0,1.0	-0.151
4435	ARHGAP29	9411	NC_000001.11	-	94191712	94201857	94191712	94200694	94201719	94201857	4435	113109151	4,4,1	47351450	0,2,0	1174	149	8.11e-05	0.00525294	0.782,0.776,0.95	1.0,0.957,1.0	-0.15
8399	PROSER3	148137	NC_000019.10	+	35768403	35771770	35768403	35768569	35768764	35771770	8399	44,58,24	2,3,5	24,74,85	0,1,2	344	149	0.00132534	0.0315975	0.905,0.893,0.675	1.0,0.97,0.948	-0.148
8094	TNPO2	30000	NC_000019.10	-	12723248	12724481	12723248	12723360	12723768	12724481	8094	40,38,48	6,0,3	2,59,87	0,2,0	557	149	0.000754384	0.0227495	0.641,1.0,0.811	1.0,0.888,1.0	-0.145
7487	FUBP1	8880	NC_000001.11	-	77944054	77945642	77944054	77944269	77945505	77945642	7487	10709831084	32,21,44	174924261956	17,19,18	1385	149	1.04e-10	8e-08	0.782,0.834,0.726	0.917,0.932,0.921	-0.143
6435	NAA60	79903	NC_000016.10	+	3484698	3486963	3484698	3485061	3485466	3486963	6435	92,97,83	66,67,67	69216237	30,88,79	554	149	9.82e-06	0.00122513	0.273,0.28,0.25	0.382,0.398,0.447	-0.141
2567	UGCG	7357	NC_000009.12	+	111927472	111929678	111927472	111927594	111929499	111929678	2567	353352454	8,13,6	290863769	3,5,7	2054	149	0.00114272	0.0290449	0.762,0.663,0.846	0.875,0.926,0.889	-0.14
7733	TSNAXIP1	55815	NC_000016.10	+	67825666	67826076	67825666	67825836	67826027	67826076	7733	14,2,10	2,0,4	7,34,25	1,1,0	340	149	0.00208576	0.0456437	0.754,1.0,0.523	0.754,0.937,1.0	-0.138
6705	LRRC14	9684	NC_000008.11	+	144520910	144525178	144520910	144524105	144524260	144525178	6705	99,81,102	11,16,20	125208205	5,16,16	304	149	0.000429594	0.0164937	0.815,0.713,0.714	0.925,0.864,0.863	-0.137
550	TRPC4AP	26133	NC_000020.11	-	35003872	35004570	35003872	35004090	35004457	35004570	550	44,61,121	8,2,4	49,109,98	2,2,0	516	149	0.00209259	0.0456437	0.614,0.898,0.897	0.876,0.94,1.0	-0.136
5872	BOK	666	NC_000002.12	+	241572296	241574131	241572296	241573296	241573336	241574131	5872	185126124	0,34,17	160289326	0,0,0	189	149	2.21e-14	3.4e-11	1.0,0.745,0.852	1.0,1.0,1.0	-0.134
6974	POLL	27343	NC_000010.11	-	101587245	101588270	101587245	101587406	101587821	101588270	6974	64,52,104	10,2,3	33159153	1,2,2	564	149	0.00122424	0.0303642	0.628,0.873,0.902	0.897,0.955,0.953	-0.134
5581	GATD1	347862	NC_000011.10	-	767221	771104	767221	770903	770992	771104	5581	107,85,90	87,72,101	92207218	66,99,100	238	149	0.000457608	0.0167873	0.435,0.425,0.358	0.466,0.567,0.577	-0.131
8042	ZNF131	7690	NC_000005.10	+	43161248	43161931	43161248	43161606	43161708	43161931	8042	41,29,34	63,71,60	32,81,89	30,86,89	251	149	0.000511419	0.0172843	0.279,0.195,0.252	0.388,0.359,0.372	-0.131
7125	B3GALNT1	8706	NC_000003.12	-	161104784	161105349	161104784	161104895	161105234	161105349	7125	46,23,48	4,1,2	25,80,77	0,1,1	488	149	0.00220216	0.0473174	0.778,0.875,0.88	1.0,0.961,0.959	-0.129
8867	ABCD4	5826	NC_000014.9	-	74285268	74286816	74285268	74286529	74286700	74286816	8867	78,63,87	98,87,86	170203158	112122121	320	149	3.02e-05	0.00261597	0.27,0.252,0.32	0.414,0.437,0.378	-0.129
7169	CHTF18	63922	NC_000016.10	+	790524	792347	790524	791370	792223	792347	7169	197200197	0,6,8	126353342	0,0,0	1002	149	8.43e-07	0.000225542	1.0,0.832,0.785	1.0,1.0,1.0	-0.128
9132	WDR90	197335	NC_000016.10	+	662219	665801	662219	662331	665678	665801	9132	503433549	4,5,2	38611441008	0,0,3	3496	149	0.000185037	0.00925334	0.843,0.787,0.921	1.0,1.0,0.935	-0.128
3028	CYBC1	79415	NC_000017.11	-	82449430	82450802	82449430	82450254	82450699	82450802	3028	87,71,59	1,1,8	52160172	0,3,0	594	149	0.00106039	0.0277553	0.956,0.947,0.649	1.0,0.93,1.0	-0.126
8668	MED28	80306	NC_000004.12	+	17623600	17634105	17623600	17625845	17628005	17634105	8668	288321312	2,4,10	225571640	2,1,3	2309	149	0.00146985	0.0347456	0.903,0.838,0.668	0.879,0.974,0.932	-0.125
4733	BTN2A2	10385	NC_000006.12	+	26390004	26395630	26390004	26390211	26390802	26395630	4733	104,93,83	5,0,6	55186160	0,1,2	740	149	0.000829764	0.0238499	0.807,1.0,0.736	1.0,0.974,0.942	-0.124
7211	SNAPC4	6621	NC_000009.12	-	136398298	136400363	136398298	136398437	136400133	136400363	7211	11,10,11	13,7,14	8,50,50	2,16,23	1845	149	0.000508735	0.0172843	0.064,0.103,0.06	0.244,0.202,0.149	-0.123
4429	PLCD4	84812	NC_000002.12	+	218636242	218637175	218636242	218636578	218636918	218637175	4429	85,87,99	6,1,5	62124146	0,0,0	489	149	4.56e-06	0.000825488	0.812,0.964,0.858	1.0,1.0,1.0	-0.122
3953	TMEM205	374882	NC_000019.10	-	11345519	11346268	11345519	11345737	11346207	11346268	3953	209159207	14,9,15	155324318	3,12,6	619	149	0.00079757	0.0232792	0.782,0.81,0.769	0.926,0.867,0.927	-0.12
1129	VAPA	9218	NC_000018.10	+	9954052	9960021	9954052	9957174	9957300	9960021	1129	33,23,30	0,0,9	46,70,64	0,0,0	275	149	0.000527725	0.0176415	1.0,1.0,0.644	1.0,1.0,1.0	-0.119
3827	LOC124900605	124900605	NC_000002.12	+	191682491	191683804	191682491	191682595	191683728	191683804	3827	765586894	86,60,76	52215241709	28,96,112	1282	149	0.000285827	0.0126484	0.508,0.532,0.578	0.684,0.649,0.639	-0.118
4904	IGFN1	91156	NC_000001.11	+	201206082	201209622	201206082	201209322	201209532	201209622	4904	64,330,62	12,5,0	31281266	0,0,0	359	149	5.5e-06	0.00089028	0.689,0.965,1.0	1.0,1.0,1.0	-0.115
3286	PDZD11	51248	NC_000023.11	-	70289254	70289593	70289254	70289354	70289521	70289593	3286	13,6,9	49,44,59	20,38,24	29,73,75	316	149	0.000149459	0.0082152	0.111,0.06,0.067	0.245,0.197,0.131	-0.112
6032	EMC3-AS1	442075	NC_000003.12	+	10002716	10007004	10002716	10004766	10005107	10007004	6032	61,62,56	5,0,3	27103112	0,0,1	490	149	0.000623113	0.0196552	0.788,1.0,0.85	1.0,1.0,0.971	-0.111
4177	TRIB1	10221	NC_000008.11	+	125433316	125438403	125433316	125433768	125436005	125438403	4177	893683864	46,31,37	25317221467	9,48,37	2386	149	0.00129637	0.0312704	0.548,0.579,0.593	0.637,0.691,0.712	-0.107
4608	ANKZF1	55139	NC_000002.12	+	219235473	219235875	219235473	219235585	219235707	219235875	4608	37,21,38	108105114	48121139	109180210	271	149	3.43e-06	0.000702915	0.159,0.099,0.155	0.195,0.27,0.267	-0.106
7488	FUBP1	8880	NC_000001.11	-	77944054	77948774	77944054	77945642	77946529	77948774	7488	697650697	31,28,36	64414701302	14,33,32	1036	149	6.49e-05	0.00458723	0.764,0.77,0.736	0.869,0.865,0.854	-0.106
804	ZNF266	10781	NC_000019.10	-	9418504	9419289	9418504	9418631	9419216	9419289	804	21,18,35	47,27,28	11,67,62	10,30,44	734	149	0.000855318	0.0243568	0.083,0.119,0.202	0.183,0.312,0.222	-0.104
7150	FAM214B	80256	NC_000009.12	-	35107380	35108349	35107380	35107568	35108127	35108349	7150	252179184	8,5,4	90302318	0,1,1	708	149	3.56e-06	0.000707097	0.869,0.883,0.906	1.0,0.985,0.985	-0.104
1922	C5AR1	728	NC_000019.10	+	47273965	47276496	47273965	47274498	47275046	47276496	1922	62,48,57	62,50,50	93,135,73	52,59,49	697	149	0.000459432	0.0167873	0.176,0.17,0.196	0.277,0.328,0.242	-0.102
392	ZDHHC8	29801	NC_000022.11	+	20139719	20140217	20139719	20139892	20140114	20140217	392	82,63,59	116,79,93	34195201	40154133	371	149	0.000434245	0.0164937	0.221,0.243,0.203	0.254,0.337,0.378	-0.101
2412	ACADVL	37	NC_000017.11	+	7222666	7223237	7222666	7222865	7223132	7223237	2412	450413499	448330374	512882976	265582469	416	149	1.31e-05	0.0014096	0.265,0.31,0.323	0.409,0.352,0.427	-0.097
7273	CLK1	1195	NC_000002.12	-	200859679	200861466	200859679	200859746	200861237	200861466	7273	220221203	145127106	191634589	96155148	1640	149	5.75e-06	0.000906856	0.121,0.137,0.148	0.153,0.271,0.266	-0.095
6302	TRIM65	201292	NC_000017.11	-	75891812	75892185	75891812	75891878	75892010	75892185	6302	5,3,1	33,22,29	6,14,13	17,41,46	281	149	0.00121459	0.0302468	0.074,0.067,0.018	0.158,0.153,0.13	-0.094
1126	RNMT	8731	NC_000018.10	+	13759941	13764556	13759941	13760208	13762038	13764556	1126	502467496	4,6,2	21211621209	0,0,2	1979	149	5.02e-05	0.00376916	0.904,0.854,0.949	1.0,1.0,0.979	-0.091
6702	LRRC14	9684	NC_000008.11	+	144523635	144524105	144523635	144523809	144523923	144524105	6702	103,96,97	17,7,5	105206168	4,3,7	263	149	0.00036232	0.0150583	0.774,0.886,0.917	0.937,0.975,0.931	-0.089
5027	SLFN13	146857	NC_000017.11	-	35444614	35446753	35444614	35445693	35446716	35446753	5027	643621822	36,18,25	15914551731	4,35,24	1172	149	0.000879991	0.0244221	0.694,0.814,0.807	0.835,0.841,0.902	-0.088
3994	EIF6	3692	NC_000020.11	-	35284380	35284725	35284380	35284492	35284696	35284725	3994	183149171	18,7,9	188317318	4,7,6	353	149	7.86e-05	0.00520295	0.811,0.9,0.889	0.952,0.95,0.957	-0.086
2450	BMP1	649	NC_000008.11	+	22201117	22201928	22201117	22201535	22201802	22201928	2450	65,79,72	3,2,3	46184179	0,0,2	416	149	0.00208152	0.0456437	0.886,0.934,0.896	1.0,1.0,0.97	-0.085
9580	SEC14L1	6397	NC_000017.11	+	77213917	77217101	77213917	77216231	77216413	77217101	9580	141,120,98	24,2,1	137170177	1,4,1	331	149	0.000245247	0.0116847	0.726,0.964,0.978	0.984,0.95,0.988	-0.085
5166	METTL5	29081	NC_000002.12	-	169824488	169824905	169824488	169824640	169824867	169824905	5166	38,33,19	72,61,67	48,76,74	87,89,79	376	149	0.00239201	0.0498754	0.173,0.177,0.101	0.179,0.253,0.271	-0.084
1514	KIF6	221458	NC_000006.12	-	39431052	39431390	39431052	39431161	39431286	39431390	1514	48,52,62	5,2,2	49,97,92	0,1,1	274	149	0.00150718	0.0350485	0.839,0.934,0.944	1.0,0.981,0.98	-0.081
7437	SMOX	54498	NC_000020.11	+	4182088	4182848	4182088	4182323	4182482	4182848	7437	369292292	41,17,40	290454489	8,25,32	308	149	0.000549963	0.0178985	0.813,0.893,0.779	0.946,0.898,0.881	-0.08
4079	HES4	57801	NC_000001.11	-	999525	1000097	999525	999613	999691	1000097	4079	118,78,98	257220211	166197210	288298300	227	149	0.000470477	0.0167873	0.232,0.189,0.234	0.274,0.303,0.315	-0.079
768	AKAP8L	26993	NC_000019.10	-	15403474	15403715	15403474	15403555	15403657	15403715	768	326253269	78,62,79	223488423	42,76,74	251	149	0.00220779	0.0473174	0.713,0.708,0.669	0.759,0.792,0.772	-0.078
4945	IGFN1	91156	NC_000001.11	+	201215538	201216753	201215538	201216144	201216453	201216753	4945	161816811819	188118155	134841264451	62246224	458	149	1.86e-06	0.000423829	0.737,0.823,0.792	0.876,0.845,0.866	-0.078
2228	Novel.18400	NA	NC_000020.11	+	30404267	30406582	30404267	30405084	30405130	30406582	2228	44,53,56	0,12,0	44,89,93	0,0,0	195	149	0.000112186	0.00657197	1.0,0.771,1.0	1.0,1.0,1.0	-0.076
5536	CNOT9	9125	NC_000002.12	+	218592615	218597080	218592615	218592707	218594107	218597080	5536	215220242	196141180	210498515	56262285	1549	149	0.000167458	0.00865575	0.095,0.13,0.115	0.265,0.155,0.148	-0.076
4394	YDJC	150223	NC_000022.11	-	21629542	21630730	21629542	21629761	21629850	21630730	4394	64,48,37	235212209	65131124	170346302	238	149	5.98e-05	0.00427823	0.146,0.124,0.1	0.193,0.192,0.204	-0.073
4504	TMEM138	51524	NC_000011.10	+	61364251	61364518	61364251	61364315	61364432	61364518	4504	173118160	15,7,12	99304209	2,8,6	266	149	0.000393181	0.0159756	0.866,0.904,0.882	0.965,0.955,0.951	-0.073
7454	DCTD	1635	NC_000004.12	-	182916672	182917611	182916672	182916857	182917310	182917611	7454	121,79,89	6,0,3	56163142	1,0,0	602	149	0.000492052	0.0170034	0.833,1.0,0.88	0.933,1.0,1.0	-0.073
9233	KAT8	84148	NC_000016.10	+	31111868	31114429	31111868	31112027	31112120	31114429	9233	295219215	349290339	333503519	349532447	242	149	0.00211072	0.0458012	0.342,0.317,0.281	0.37,0.368,0.417	-0.072
6536	HENMT1	113802	NC_000001.11	-	108659863	108661991	108659863	108659962	108661183	108661991	6536	42,40,49	57,38,35	37,116,94	32,45,43	1370	149	0.000423722	0.0163919	0.074,0.103,0.132	0.112,0.219,0.192	-0.071
3546	CDCA8	55143	NC_000001.11	+	37692515	37692784	37692515	37692578	37692675	37692784	3546	296237203	57,44,35	88428450	13,49,42	246	149	0.00110527	0.0283272	0.759,0.765,0.778	0.804,0.841,0.866	-0.07
6433	LRCH4	4034	NC_000007.14	-	100576901	100577154	100576901	100577005	100577085	100577154	6433	7,6,5	85,65,69	12,21,17	48,102,95	229	149	0.000754496	0.0227495	0.051,0.057,0.045	0.14,0.118,0.104	-0.07
1355	DMTF1	9988	NC_000007.14	+	87185828	87188301	87185828	87185980	87188091	87188301	1355	227197219	125,92,105	54570632	26137146	2260	149	8.76e-06	0.00114523	0.107,0.124,0.121	0.12,0.215,0.222	-0.068
5889	NCBP1	4686	NC_000009.12	+	97671085	97675768	97671085	97671223	97672667	97675768	5889	11019221056	10,12,14	97019921951	3,9,10	1593	149	0.000469356	0.0167873	0.911,0.878,0.876	0.968,0.954,0.948	-0.068
8713	GMPR2	51292	NC_000014.9	+	24238245	24239242	24238245	24238405	24238588	24239242	8713	0,1,0	5,3,12	0,3,6	4,15,8	332	149	0.00150315	0.0350485	0.0,0.13,0.0	0.0,0.082,0.252	-0.068
9236	KAT8	84148	NC_000016.10	+	31130745	31131393	31130745	31130900	31131194	31131393	9236	31,48,31	114118117	82,96,79	156151135	443	149	5.72e-05	0.0041373	0.084,0.12,0.082	0.15,0.176,0.164	-0.068
516	RRBP1	6238	NC_000020.11	-	17658604	17660528	17658604	17659064	17659124	17660528	516	139130123	10,20,0	64192236	0,5,6	209	149	0.000548465	0.0178985	0.908,0.823,1.0	1.0,0.965,0.966	-0.067
4456	APOL6	80830	NC_000022.11	+	35658614	35668434	35658614	35667168	35667805	35668434	4456	116108197	1,0,7	70224209	0,0,0	786	149	0.00211471	0.0458012	0.957,1.0,0.842	1.0,1.0,1.0	-0.067
6339	ZNF33A	7581	NC_000010.11	+	38012297	38017015	38012297	38012350	38016870	38017015	6339	101107144	134,67,97	110483575	30140146	4669	149	0	0	0.023,0.048,0.045	0.105,0.099,0.112	-0.067
8967	IGF1R	3480	NC_000015.10	+	98957060	98964530	98957060	98957476	98957962	98964530	8967	298295292	8,9,9	65607657	1,5,6	635	149	0.000417049	0.0162359	0.897,0.885,0.884	0.938,0.966,0.963	-0.067
764	SMIM7	79086	NC_000019.10	-	16646147	16647261	16646147	16646800	16647095	16647261	764	651469594	41,30,49	8281095972	33,49,36	444	149	0.000583725	0.0187005	0.842,0.84,0.803	0.894,0.882,0.901	-0.064
9581	SEC14L1	6397	NC_000017.11	+	77216257	77217101	77216257	77216270	77216439	77217101	9581	201138138	0,15,0	184223227	0,0,0	318	149	7.33e-05	0.00501074	1.0,0.812,1.0	1.0,1.0,1.0	-0.063
7679	SFSWAP	6433	NC_000012.12	+	131711089	131714193	131711089	131711447	131714070	131714193	7679	126123136	141101144	64427510	35201160	2772	149	9.27e-13	1.14e-09	0.046,0.061,0.048	0.089,0.102,0.146	-0.061
4256	SLC66A1	54896	NC_000001.11	+	19327226	19328800	19327226	19327412	19328571	19328800	4256	138126150	87102112	204355380	119161149	1308	149	0.000303278	0.0133247	0.153,0.123,0.132	0.163,0.201,0.225	-0.06
3030	ARFGAP1	55738	NC_000020.11	+	63287563	63289790	63287563	63289496	63289677	63289790	3030	422328377	15,19,16	688766662	11,10,11	330	149	7.03e-06	0.00100635	0.927,0.886,0.914	0.966,0.972,0.965	-0.059
3392	CCDC30	728621	NC_000001.11	+	42456542	42457350	42456542	42457073	42457246	42457350	3392	25,15,21	260191211	53,64,55	171318271	322	149	7.62e-08	3.35e-05	0.043,0.035,0.044	0.125,0.085,0.086	-0.058
5165	METTL5	29081	NC_000002.12	-	169824488	169824905	169824488	169824640	169824781	169824905	5165	38,33,19	187124150	48,76,74	175200198	290	149	0.000340972	0.0146666	0.095,0.12,0.061	0.124,0.163,0.161	-0.057
3974	PLEKHA1	59338	NC_000010.11	+	122428275	122442600	122428275	122428316	122429623	122442600	3974	158179182	158126176	92460413	53233218	1456	149	1.48e-05	0.00151814	0.093,0.127,0.096	0.151,0.168,0.162	-0.055
520	RRBP1	6238	NC_000020.11	-	17658604	17660528	17658604	17658770	17659604	17660528	520	815867730	0,0,21	36015641611	0,0,0	983	149	5.31e-06	0.000882609	1.0,1.0,0.84	1.0,1.0,1.0	-0.053
5777	AHNAK	79026	NC_000011.10	-	62526640	62534074	62526640	62528377	62529385	62534074	5777	367927783563	29,30,45	15060156565	0,45,12	1157	149	3.39e-06	0.000702915	0.942,0.923,0.911	1.0,0.945,0.986	-0.052
8479	KRIT1	889	NC_000007.14	-	92237666	92241152	92237666	92237759	92240992	92241152	8479	134162168	114,71,68	90453435	35109120	3382	149	4.94e-07	0.000138015	0.049,0.091,0.098	0.102,0.155,0.138	-0.052
2285	BRPF3	27154	NC_000006.12	+	36228901	36232790	36228901	36229056	36230425	36232790	2285	121,108,99	93,71,70	30315333	18119157	1518	149	0.000508991	0.0172843	0.113,0.13,0.122	0.141,0.206,0.172	-0.051
7971	NOB1	28987	NC_000016.10	-	69754593	69754926	69754593	69754726	69754847	69754926	7971	5,1,1	110,74,109	4,35,15	83187178	270	149	4.04e-07	0.00011844	0.024,0.007,0.005	0.026,0.094,0.044	-0.043
9451	RRAD	6236	NC_000016.10	-	66924809	66925535	66924809	66925194	66925408	66925535	9451	55,36,59	266168205	79183148	267454384	363	149	0.000780901	0.0230929	0.078,0.081,0.106	0.108,0.142,0.137	-0.041
9216	ASPHD1	253982	NC_000016.10	+	29900487	29900741	29900487	29900555	29900730	29900741	9216	341259279	14,10,7	334420356	10,1,4	324	149	0.00164804	0.0376843	0.918,0.923,0.948	0.939,0.995,0.976	-0.04
8475	DDIT3	1649	NC_000012.12	-	57517268	57517753	57517268	57517595	57517705	57517753	8475	176143189	5,4,10	134213302	3,2,1	259	149	0.000471133	0.0167873	0.953,0.954,0.916	0.963,0.984,0.994	-0.039
988	KXD1	79036	NC_000019.10	+	18568401	18569378	18568401	18568679	18568829	18569378	988	423316393	10,10,22	359712588	6,16,6	299	149	0.0020146	0.0445749	0.955,0.94,0.899	0.968,0.957,0.98	-0.037
5767	AHNAK	79026	NC_000011.10	-	62515901	62522515	62515901	62521462	62522230	62522515	5767	427833884148	0,0,74	72074527461	0,0,0	917	149	7.73e-11	6.79e-08	1.0,1.0,0.901	1.0,1.0,1.0	-0.033
6682	CCNL2	81669	NC_000001.11	-	1390765	1391575	1390765	1390865	1391296	1391575	6682	131011741481	25,13,28	86926472837	5,24,20	580	149	0.000196392	0.00966405	0.931,0.959,0.931	0.978,0.966,0.973	-0.032
9217	ASPHD1	253982	NC_000016.10	+	29900487	29901920	29900487	29900741	29901551	29901920	9217	122181166	332241269	187324289	297363321	959	149	0.000869622	0.0244221	0.054,0.104,0.087	0.089,0.122,0.123	-0.03
3810	ZBED6	100381270	NC_000001.11	+	203795622	203803016	203795622	203795794	203802956	203803016	3810	489140845280	4,9,5	74477898566	1,5,0	7311	149	0.00127244	0.0311823	0.961,0.902,0.956	0.938,0.969,1.0	-0.029
7651	MKI67	4288	NC_000010.11	-	128102578	128109423	128102578	128104497	128105946	128109423	7651	456836163972	8,21,3	39276737085	0,2,0	1598	149	4.87e-05	0.00369624	0.982,0.941,0.992	1.0,0.997,1.0	-0.027
9505	TM7SF2	7108	NC_000011.10	+	65110693	65112067	65110693	65110781	65111326	65112067	9505	18,21,21	168115179	30,79,51	171220185	694	149	2.15e-05	0.00192004	0.022,0.038,0.025	0.036,0.072,0.056	-0.026
1243	SRSF1	6426	NC_000017.11	-	58004922	58005973	58004922	58005041	58005800	58005973	1243	317929592992	44,29,34	266757505666	30,28,31	908	149	0.000349896	0.014773	0.922,0.944,0.935	0.936,0.971,0.968	-0.025
342	PNPLA3	80339	NC_000022.11	+	43944690	43951723	43944690	43944795	43946153	43951723	342	45,23,34	70,66,103	24,85,117	49129122	1507	149	0.000928789	0.0252787	0.06,0.033,0.032	0.046,0.061,0.087	-0.023
9090	RPS17	6218	NC_000015.10	-	82539980	82540457	82539980	82540132	82540425	82540457	9090	4,0,3	84,49,86	8,17,10	105113133	442	149	0.000818995	0.0236509	0.016,0.0,0.012	0.025,0.048,0.025	-0.023
4905	IGFN1	91156	NC_000001.11	+	201206082	201209694	201206082	201209235	201209661	201209694	4905	144879112	0,16,0	58605653	0,0,0	575	149	9.17e-05	0.00573187	1.0,0.934,1.0	1.0,1.0,1.0	-0.022
2255	UBXN1	51035	NC_000011.10	-	62676499	62677005	62676499	62676639	62676812	62677005	2255	13,20,12	313292258	33,48,36	399430384	322	149	0.000934511	0.0253224	0.019,0.031,0.021	0.037,0.049,0.042	-0.019
4994	HAVCR1	26762	NC_000005.10	-	157057897	157058920	157057897	157058076	157058303	157058920	4994	176215001625	25,11,22	51833752798	0,6,30	376	149	0.000411763	0.0161322	0.965,0.982,0.967	1.0,0.996,0.974	-0.019
5237	SREBF1	6720	NC_000017.11	-	17814614	17814944	17814614	17814747	17814834	17814944	5237	10,6,11	452381446	18,27,35	450723670	236	149	0.000893347	0.0244221	0.014,0.01,0.015	0.025,0.023,0.032	-0.014
5771	AHNAK	79026	NC_000011.10	-	62525245	62527548	62525245	62525488	62526640	62527548	5771	482340714801	13,0,5	33778818723	0,18,49	1301	149	1.1e-05	0.00131215	0.977,1.0,0.991	1.0,0.98,0.953	0.012
5781	AHNAK	79026	NC_000011.10	-	62528740	62534074	62528740	62529385	62530759	62534074	5781	541940805603	13,0,0	195871810223	0,27,33	1523	149	4.93e-06	0.000841528	0.976,1.0,1.0	1.0,0.969,0.968	0.013
5770	AHNAK	79026	NC_000011.10	-	62524827	62527954	62524827	62525448	62526600	62527954	5770	485541234848	0,0,0	34879678845	0,0,49	1301	149	2.09e-05	0.0018902	1.0,1.0,1.0	1.0,1.0,0.954	0.015
7068	DNM1	1759	NC_000009.12	+	128222792	128234107	128222792	128222860	128234020	128234107	7068	9105978311192	0,0,0	23662005722158	0,20,0	11309	149	0.000787813	0.0231858	1.0,1.0,1.0	1.0,0.93,1.0	0.023
2054	AHNAK2	113146	NC_000014.9	-	104937252	104954799	104937252	104944161	104952081	104954799	2054	397627123276	3,0,1	20465688014	0,5,16	8069	149	0.00089038	0.0244221	0.961,1.0,0.984	1.0,0.96,0.902	0.028
519	RRBP1	6238	NC_000020.11	-	17658604	17660528	17658604	17659244	17659514	17660528	519	193237203	0,2,0	81462438	0,7,12	419	149	0.000307391	0.0134097	1.0,0.977,1.0	1.0,0.959,0.928	0.03
8848	IL10RB	3588	NC_000021.9	+	33229898	33241977	33229898	33230216	33241885	33241977	8848	636649818	108,82,103	12210821322	76192210	11818	149	0.000272675	0.0122719	0.069,0.091,0.091	0.02,0.066,0.074	0.03
5772	AHNAK	79026	NC_000011.10	-	62525245	62528377	62525245	62527548	62528133	62528377	5772	284422132611	0,0,39	14946434935	0,105,65	734	149	2.17e-10	1.48e-07	1.0,1.0,0.931	1.0,0.9,0.939	0.031
3344	CCDC14	64770	NC_000003.12	-	123956354	123961465	123956354	123956795	123961143	123961465	3344	507433702	267186225	52690871	54470512	4497	149	7.04e-06	0.00100635	0.059,0.072,0.094	0.031,0.046,0.053	0.032
6625	FHIP2B	64760	NC_000008.11	+	22102792	22104911	22102792	22103185	22104068	22104911	6625	641565648	1,0,1	63312001189	5,6,7	1032	149	0.00154126	0.0356403	0.989,1.0,0.989	0.948,0.967,0.961	0.034
1673	DOP1A	23033	NC_000006.12	+	83167861	83169534	83167861	83168756	83169477	83169534	1673	767452650	2,1,3	45812351196	7,15,4	870	149	0.00236328	0.0496127	0.985,0.987,0.974	0.918,0.934,0.981	0.038
4777	ZFAND2B	130617	NC_000002.12	+	219208571	219209648	219208571	219208639	219208976	219209648	4777	45,44,69	166136143	48,45,61	247248249	486	149	0.000444403	0.0167701	0.077,0.09,0.129	0.056,0.053,0.07	0.039
4430	UQCC1	55245	NC_000020.11	-	35302577	35306779	35302577	35304069	35306665	35306779	4430	361360442	172122125	174528499	131233234	2745	149	0.00128711	0.0312233	0.102,0.138,0.161	0.067,0.11,0.104	0.04
1056	GADD45B	4616	NC_000019.10	+	2477028	2478257	2477028	2477251	2477487	2478257	1056	60,47,47	168147169	20,83,71	223305351	385	149	0.000997655	0.0264878	0.121,0.11,0.097	0.034,0.095,0.073	0.042
8225	CPSF6	11052	NC_000012.12	+	69262372	69274899	69262372	69262562	69269511	69274899	8225	113712211502	264225210	41620912468	406547496	7098	149	1.59e-11	1.63e-08	0.083,0.102,0.131	0.021,0.074,0.095	0.042
7806	UBC	7316	NC_000012.12	-	124912864	124913774	124912864	124913320	124913548	124913774	7806	126781121010648	348350550	92411865716986	755976775	377	149	5.97e-08	3.06e-05	0.935,0.927,0.884	0.829,0.883,0.897	0.046
2955	TARBP1	6894	NC_000001.11	-	234472713	234479181	234472713	234472811	234478172	234479181	2955	215218341	39,27,47	62352443	12,99,93	5510	149	0.00182842	0.0411964	0.13,0.179,0.164	0.123,0.088,0.114	0.049
390	LINC01637	101928891	NC_000022.11	+	20949710	20954730	20949710	20951265	20953205	20954730	390	360328613502	20,15,12	277156895520	31,45,47	2089	149	0.000395229	0.0159756	0.928,0.932,0.954	0.864,0.9,0.893	0.052
2544	MTHFD2L	441024	NC_000004.12	+	74160054	74162253	74160054	74160088	74161779	74162253	2544	452399479	1,0,0	407688740	0,8,4	1840	149	0.000405445	0.0159865	0.973,1.0,1.0	1.0,0.874,0.937	0.054
1485	PNISR	25957	NC_000006.12	-	99402539	99404702	99402539	99402710	99403828	99404702	1485	8637691101	306241292	38713601371	215503527	1267	149	0.00188789	0.0421471	0.249,0.273,0.307	0.175,0.241,0.234	0.06
5512	ABI2	10152	NC_000002.12	+	203427176	203432169	203427176	203427269	203427495	203432169	5512	453327394	12,19,18	217485481	15,37,42	375	149	0.000879615	0.0244221	0.937,0.872,0.897	0.852,0.839,0.82	0.065
2739	CCNL1	57018	NC_000003.12	-	157146665	157149385	157146665	157148589	157149286	157149385	2739	780633637	438392445	540932859	572861832	846	149	1.62e-06	0.000382768	0.239,0.221,0.201	0.143,0.16,0.154	0.068
1391	DPH2	1802	NC_000001.11	+	43970595	43971189	43970595	43970708	43970905	43971189	1391	23,17,33	1,0,0	8,63,56	0,5,4	346	149	0.000526374	0.0176415	0.908,1.0,1.0	1.0,0.844,0.858	0.069
5697	MPV17	4358	NC_000002.12	-	27312993	27317234	27312993	27313074	27317077	27317234	5697	349280383	1,0,0	173759667	0,1,8	4152	149	0.000642173	0.0201531	0.926,1.0,1.0	1.0,0.965,0.75	0.07
1808	CFLAR	8837	NC_000002.12	+	201163834	201177062	201163834	201166335	201166414	201177062	1808	26,35,28	0,0,0	34,66,67	0,0,12	228	149	0.00026291	0.0121609	1.0,1.0,1.0	1.0,1.0,0.785	0.072
4029	PRKAR2A	5576	NC_000003.12	-	48746585	48751718	48746585	48747940	48751584	48751718	4029	162214111516	1,1,7	52822682246	2,21,7	3793	149	0.00120691	0.0301777	0.985,0.982,0.895	0.912,0.809,0.926	0.072
497	DSN1	79980	NC_000020.11	-	36771424	36774250	36771424	36771473	36773661	36774250	497	431342407	102,71,79	164595627	83184168	2337	149	0.000475326	0.0168011	0.212,0.235,0.247	0.112,0.171,0.192	0.073
8644	CCN2	1490	NC_000006.12	-	131949948	131951372	131949948	131950160	131950291	131951372	8644	821646664	808636773	53017311670	104023672032	280	149	0.000484296	0.0169256	0.351,0.351,0.314	0.213,0.28,0.304	0.073
4176	TRIB1	10221	NC_000008.11	+	125433316	125438403	125433316	125433609	125436005	125438403	4176	1016759952	171131181	26818791603	124367426	2545	149	0.000350652	0.014773	0.258,0.253,0.235	0.112,0.231,0.181	0.074
6331	CAPRIN2	65981	NC_000012.12	-	30753343	30754951	30753343	30753559	30754750	30754951	6331	48,42,67	0,1,0	6127125	0,3,4	1340	149	0.00113307	0.0289191	1.0,0.824,1.0	1.0,0.825,0.777	0.074
7886	SUPT6H	6830	NC_000017.11	+	28670571	28673510	28670571	28671231	28673370	28673510	7886	47,36,63	0,1,0	16219168	0,5,4	2288	149	0.000263133	0.0121609	1.0,0.701,1.0	1.0,0.74,0.732	0.076
2451	BMP1	649	NC_000008.11	+	22210812	22212326	22210812	22211038	22211593	22212326	2451	27,35,35	0,2,0	9,57,56	0,4,3	704	149	0.0011505	0.0291224	1.0,0.787,1.0	1.0,0.751,0.798	0.079
8237	PGS1	9489	NC_000017.11	+	78419545	78424659	78419545	78419675	78420213	78424659	8237	97,78,78	2,0,1	30152163	0,9,7	687	149	0.00123635	0.0304191	0.913,1.0,0.944	1.0,0.786,0.835	0.079
6333	CDK3	1018	NC_000017.11	+	76000140	76001541	76000140	76000489	76001411	76001541	6333	158119105	0,0,1	146221192	4,5,0	1071	149	0.00107415	0.0279281	1.0,1.0,0.936	0.835,0.86,1.0	0.08
2743	CCNL1	57018	NC_000003.12	-	157150281	157152241	157150281	157151930	157152176	157152241	2743	400383400	49,46,41	192759717	35119142	395	149	0.00139135	0.0330431	0.755,0.758,0.786	0.674,0.706,0.656	0.088
3598	TTLL3	26140	NC_000003.12	+	9817644	9818920	9817644	9817759	9818821	9818920	3598	170173209	0,0,1	75404442	1,6,6	1211	149	0.000160619	0.00844417	1.0,1.0,0.963	0.902,0.892,0.901	0.089
8645	CCN2	1490	NC_000006.12	-	131950291	131951372	131950291	131950543	131950769	131951372	8645	493484410	288267314	33510811083	424943805	375	149	0.000890019	0.0244221	0.405,0.419,0.342	0.239,0.313,0.348	0.089
6565	CDCA2	157313	NC_000008.11	+	25506509	25514156	25506509	25507580	25509992	25514156	6565	334312315	0,1,1	203567432	1,14,0	2561	149	0.000321405	0.0139223	1.0,0.948,0.948	0.922,0.702,1.0	0.091
5240	PRPF40A	55660	NC_000002.12	-	152717355	152718446	152717355	152717431	152717830	152718446	5240	91,71,80	1,0,2	58194155	3,7,6	548	149	0.0023617	0.0496127	0.961,1.0,0.916	0.84,0.883,0.875	0.093
6162	ZNF248	57209	NC_000010.11	-	37856434	37858103	37856434	37856532	37857764	37858103	6162	156122140	0,2,0	81267241	0,3,12	1381	149	0.000372909	0.0153077	1.0,0.868,1.0	1.0,0.906,0.684	0.093
7852	ATG16L2	89849	NC_000011.10	+	72824059	72824842	72824059	72824122	72824346	72824842	7852	75,73,78	0,1,0	40121111	3,6,2	373	149	0.000359906	0.0150583	1.0,0.967,1.0	0.842,0.89,0.957	0.093
4508	PECR	55825	NC_000002.12	-	216032788	216039360	216032788	216032852	216039190	216039360	4508	534566589	0,0,0	6751107948	0,8,1	6487	149	0.000157228	0.00835365	1.0,1.0,1.0	1.0,0.761,0.956	0.094
4477	ZNF782	158431	NC_000009.12	-	96852852	96854514	96852852	96853014	96854087	96854514	4477	16,14,21	0,1,0	6,58,52	0,5,2	1222	149	6.75e-05	0.00471851	1.0,0.631,1.0	1.0,0.586,0.76	0.095
9443	CRNDE	643911	NC_000016.10	-	54920297	54923650	54920297	54920410	54923584	54923650	9443	200515852219	413298314	73419811927	593559545	3323	149	3.77e-15	7.74e-12	0.179,0.193,0.241	0.053,0.137,0.137	0.095
7569	LINC01322	103695433	NC_000003.12	+	165495220	165498180	165495220	165495266	165497943	165498180	7569	11949841490	9,5,0	74320832352	13,16,20	2826	149	0.00123164	0.0304191	0.875,0.912,1.0	0.751,0.873,0.861	0.101
2610	LOC124900660	124900660	NC_000004.12	+	9659024	9671347	9659024	9664663	9666428	9671347	2610	60,51,83	1,0,0	46131149	0,4,3	1914	149	0.000149586	0.0082152	0.824,1.0,1.0	1.0,0.718,0.795	0.104
9571	SEC14L1	6397	NC_000017.11	+	77213917	77217101	77213917	77215727	77216270	77217101	9571	87,151,59	0,0,0	67,92,92	0,0,9	692	149	0.000398387	0.0159756	1.0,1.0,1.0	1.0,1.0,0.688	0.104
2562	WDR19	57728	NC_000004.12	+	39133920	39147242	39133920	39134055	39135286	39147242	2562	40,25,39	1,0,0	16,79,70	0,1,5	1380	149	0.00223288	0.047689	0.812,1.0,1.0	1.0,0.895,0.602	0.105
8336	ZNF84	7637	NC_000012.12	+	133038874	133041482	133038874	133039012	133041099	133041482	8336	287260275	0,0,0	136685802	2,4,3	2236	149	0.00177036	0.0400349	1.0,1.0,1.0	0.819,0.919,0.947	0.105
5582	SF3B1	23451	NC_000002.12	-	197418508	197420231	197418508	197418588	197418895	197420231	5582	321223272	19,8,16	162600661	21,41,78	456	149	0.00130863	0.0313936	0.847,0.901,0.847	0.716,0.827,0.735	0.106
5276	MAT2A	4144	NC_000002.12	+	85542900	85545281	85542900	85543034	85543669	85545281	5276	215017372102	714444498	92130493433	51513631169	784	149	1.15e-05	0.00131215	0.364,0.426,0.445	0.254,0.298,0.358	0.108
7985	CELF1	10658	NC_000011.10	-	47465936	47472357	47465936	47470555	47472190	47472357	7985	671595685	0,1,3	21612641340	8,4,6	1784	149	0.00159747	0.0368016	1.0,0.98,0.95	0.693,0.963,0.949	0.108
755	SUGP2	10147	NC_000019.10	-	18990892	18994486	18990892	18993740	18994365	18994486	755	190176206	146111113	37242251	139263247	774	149	7.11e-08	3.35e-05	0.2,0.234,0.26	0.049,0.15,0.164	0.11
9547	LUC7L3	51747	NC_000017.11	+	50750500	50756219	50750500	50750694	50752199	50756219	9547	185415882238	156115133	151327562703	244291238	1654	149	0.00107608	0.0279281	0.517,0.554,0.603	0.358,0.46,0.506	0.117
6367	TRIM74	378108	NC_000007.14	-	73005692	73007011	73005692	73005777	73005802	73007011	6367	128106121	33,24,27	53185203	28,80,73	174	149	0.000868153	0.0244221	0.769,0.791,0.793	0.618,0.664,0.704	0.122
9577	SEC14L1	6397	NC_000017.11	+	77213917	77217101	77213917	77215818	77216335	77217101	9577	53,124,43	0,0,0	60,76,78	0,10,0	666	149	0.000279633	0.012464	1.0,1.0,1.0	1.0,0.63,1.0	0.123
9185	COQ7	10229	NC_000016.10	+	19081112	19083097	19081112	19081237	19081872	19083097	9185	32,67,33	0,0,2	41,100,85	2,4,5	784	149	0.00118954	0.0299479	1.0,1.0,0.758	0.796,0.826,0.764	0.124
3336	CCDC14	64770	NC_000003.12	-	123955842	123956427	123955842	123956115	123956354	123956427	3336	274164260	191132139	55298354	70398392	388	149	9.38e-07	0.000230772	0.355,0.323,0.418	0.232,0.223,0.257	0.128
6288	SLC29A2	3177	NC_000011.10	-	66366125	66366564	66366125	66366191	66366430	66366564	6288	17,23,16	0,0,1	25,45,39	2,7,1	388	149	0.000175478	0.00899469	1.0,1.0,0.86	0.828,0.712,0.937	0.128
3333	CCDC14	64770	NC_000003.12	-	123948895	123961465	123948895	123953170	123955842	123961465	3333	9788981133	1,2,0	13215372060	4,5,6	2821	149	0.000887776	0.0244221	0.981,0.96,1.0	0.635,0.942,0.948	0.139
7377	PRPF18	8559	NC_000010.11	+	13630259	13645074	13630259	13638923	13644916	13645074	7377	116126149	1,0,0	133260289	0,3,4	6142	149	4.19e-05	0.00330902	0.738,1.0,1.0	1.0,0.678,0.637	0.141
4077	AVEN	57099	NC_000015.10	-	33851780	33854945	33851780	33852146	33854840	33854945	4077	59,99,73	0,0,1	93259250	5,2,0	2843	149	0.000689583	0.0214445	1.0,1.0,0.793	0.494,0.872,1.0	0.142
7988	CELF1	10658	NC_000011.10	-	47502966	47506897	47502966	47503056	47506857	47506897	7988	6,13,12	1,0,0	12,62,28	0,2,4	3950	149	0.000891525	0.0244221	0.185,1.0,1.0	1.0,0.539,0.209	0.146
3339	CCDC14	64770	NC_000003.12	-	123956354	123956795	123956354	123956427	123956739	123956795	3339	491333490	157112141	74626710	47363367	461	149	2.56e-07	9.07e-05	0.503,0.49,0.529	0.337,0.358,0.385	0.147
3985	STXBP5	134957	NC_000006.12	+	147384713	147390473	147384713	147388154	147389061	147390473	3985	107115137	1,0,0	99184203	4,6,3	1056	149	1.82e-05	0.00174133	0.938,1.0,1.0	0.777,0.812,0.905	0.148
5420	ARHGAP26	23092	NC_000005.10	+	143207197	143207473	143207197	143207308	143207443	143207473	5420	18,14,21	0,0,1	6,40,33	1,0,7	284	149	0.000994199	0.0264878	1.0,1.0,0.917	0.759,1.0,0.712	0.149
2183	UHRF2	115426	NC_000009.12	+	6493825	6497103	6493825	6493932	6496962	6497103	2183	392388506	0,1,0	27610181164	5,8,5	3179	149	1.15e-05	0.00131215	1.0,0.948,1.0	0.721,0.856,0.916	0.152
8376	KDM6B	23135	NC_000017.11	+	7853209	7854796	7853209	7853380	7853497	7854796	8376	13,20,15	36,20,38	4,9,16	30,75,66	266	149	0.000273329	0.0122719	0.168,0.359,0.181	0.069,0.063,0.12	0.152
514	RRBP1	6238	NC_000020.11	-	17658604	17660528	17658604	17659087	17659117	17660528	514	90,76,66	0,0,34	46118130	14,42,41	179	149	0.0002031	0.00991482	1.0,1.0,0.618	0.732,0.7,0.725	0.154
8192	KRT7	3855	NC_000012.12	+	52243011	52244611	52243011	52243137	52244371	52244611	8192	47,65,62	1,0,0	71142132	4,3,2	1383	149	0.000154158	0.00831779	0.835,1.0,1.0	0.657,0.836,0.877	0.155
9441	CRNDE	643911	NC_000016.10	-	54920297	54923650	54920297	54920327	54923584	54923650	9441	228417832464	72,41,64	106623682282	79,109,86	3406	149	0.000256759	0.0120559	0.581,0.655,0.627	0.371,0.487,0.537	0.156
3282	PHTF1	10745	NC_000001.11	-	113699703	113700243	113699703	113699799	113700192	113700243	3282	125118167	4,4,11	71194141	9,21,15	542	149	0.00128378	0.0312233	0.896,0.89,0.807	0.684,0.717,0.721	0.157
7198	ZFAND5	7763	NC_000009.12	-	72360627	72365925	72360627	72360784	72364695	72365925	7198	537489599	1,0,3	176854894	2,6,11	4060	149	0.000434399	0.0164937	0.952,1.0,0.88	0.764,0.839,0.749	0.16
1730	HMGA1	3159	NC_000006.12	+	34236872	34237317	34236872	34236983	34237203	34237317	1730	21,20,17	0,0,0	5,34,34	0,4,5	369	149	8.94e-06	0.00114523	1.0,1.0,1.0	1.0,0.774,0.733	0.164
5550	BCS1L	617	NC_000002.12	+	218659682	218661307	218659682	218660748	218660938	218661307	5550	27,31,44	0,0,0	12,38,60	1,5,3	339	149	4.2e-05	0.00330902	1.0,1.0,1.0	0.841,0.77,0.898	0.164
3334	CCDC14	64770	NC_000003.12	-	123955842	123956115	123955842	123955965	123956045	123956115	3334	114,99,131	164,85,92	29155164	72306286	229	149	7.03e-05	0.00485774	0.311,0.431,0.481	0.208,0.248,0.272	0.165
4011	PTP4A2	8073	NC_000001.11	-	31906420	31908960	31906420	31908135	31908192	31908960	4011	9,6,8	0,0,2	6,20,17	2,3,5	206	149	0.0020273	0.044695	1.0,1.0,0.743	0.685,0.828,0.711	0.173
7341	INPP5E	56623	NC_000009.12	-	136431823	136432586	136431823	136431985	136432478	136432586	7341	135,87,107	24,21,31	45124138	27,48,66	642	149	0.000472152	0.0167873	0.566,0.49,0.445	0.279,0.375,0.327	0.173
7570	LINC01322	103695433	NC_000003.12	+	165495220	165498180	165495220	165495290	165497943	165498180	7570	11789701460	0,5,7	73620472317	26,17,23	2802	149	1.31e-05	0.0014096	1.0,0.912,0.917	0.601,0.865,0.843	0.173
5431	ENO3	2027	NC_000017.11	+	4955406	4956143	4955406	4955850	4955872	4956143	5431	27,35,47	0,0,0	15,40,39	16,0,0	171	149	0.00232214	0.0490841	1.0,1.0,1.0	0.45,1.0,1.0	0.183
8198	TIA1	7072	NC_000002.12	-	70225327	70228462	70225327	70227822	70228343	70228462	8198	298233298	21,23,24	71381530	20,67,73	670	149	0.000264925	0.0121609	0.759,0.693,0.734	0.441,0.558,0.618	0.19
676	LOC122539214	122539214	NC_000019.10	-	52616717	52619062	52616717	52616841	52618935	52619062	676	189214235	0,0,2	82317431	2,7,6	2243	149	3.56e-05	0.0029204	1.0,1.0,0.886	0.731,0.751,0.827	0.192
6452	Novel.8131	NA	NC_000007.14	-	103269667	103275627	103269667	103271869	103274069	103275627	6452	370310458	13,18,24	154431505	17,41,56	2349	149	0.000101649	0.00612982	0.644,0.522,0.548	0.365,0.4,0.364	0.195
7874	Novel.1822	NA	NC_000001.11	-	223951316	223952442	223951316	223952291	223952384	223952442	7874	21,21,32	18,28,23	5,18,30	20,63,41	242	149	0.00128934	0.0312233	0.418,0.316,0.461	0.133,0.15,0.311	0.2
5730	FAM111A	63901	NC_000011.10	+	59143082	59148953	59143082	59145856	59148835	59148953	5730	329345329	25,23,17	60648700	18,84,89	3128	149	4.72e-05	0.00367156	0.385,0.417,0.48	0.137,0.269,0.273	0.201
8777	NBPF19	101060226	NC_000001.11	+	149464076	149475795	149464076	149473037	149475640	149475795	8777	95,58,103	2,0,0	10188176	0,7,9	2752	149	0.000347848	0.014773	0.72,1.0,1.0	1.0,0.593,0.514	0.204
9573	SEC14L1	6397	NC_000017.11	+	77213917	77217101	77213917	77215753	77216296	77217101	9573	78,133,53	0,0,0	58,82,76	0,0,26	692	149	0.00103009	0.0271632	1.0,1.0,1.0	1.0,1.0,0.386	0.205
5183	HOXB4	3214	NC_000017.11	-	48552026	48555618	48552026	48552360	48555530	48555618	5183	150178214	0,0,1	47338428	2,2,3	3319	149	0.00150997	0.0350485	1.0,1.0,0.906	0.513,0.884,0.865	0.215
98	ZMAT1	84460	NC_000023.11	-	101882054	101884821	101882054	101882137	101882337	101884821	98	10,24,8	1,0,0	11,16,32	3,2,4	349	149	9.72e-05	0.00597952	0.81,1.0,1.0	0.61,0.774,0.774	0.217
7166	CHTF18	63922	NC_000016.10	+	788930	789360	788930	789125	789216	789360	7166	5,2,2	0,0,1	3,4,5	0,3,4	240	149	0.000142487	0.00811519	1.0,1.0,0.554	1.0,0.453,0.437	0.221
2394	CCDC198	55195	NC_000014.9	-	57470568	57475704	57470568	57471590	57472738	57475704	2394	56,69,53	0,0,0	24,134,82	2,5,0	1297	149	0.000453676	0.0167873	1.0,1.0,1.0	0.58,0.755,1.0	0.222
7612	LOC105376270	105376270	NC_000009.12	-	124447189	124450791	124447189	124448437	124449893	124450791	7612	37,42,34	1,0,0	18,75,75	1,3,2	1605	149	0.000598712	0.0190812	0.775,1.0,1.0	0.626,0.699,0.777	0.224
8776	NBPF19	101060226	NC_000001.11	+	149464076	149475795	149464076	149473037	149473306	149475795	8776	11,8,17	1,0,0	5,39,15	0,9,5	418	149	3.5e-05	0.00290649	0.797,1.0,1.0	1.0,0.607,0.517	0.224
6304	ZNF396	252884	NC_000018.10	-	35366693	35369660	35366693	35368445	35369516	35369660	6304	59,36,45	0,1,0	18,64,82	4,0,3	1220	149	0.000227562	0.0109354	1.0,0.815,1.0	0.355,1.0,0.769	0.23
8199	TIA1	7072	NC_000002.12	-	70224553	70229091	70224553	70228462	70229058	70229091	8199	324257354	19,18,21	67431583	23,73,58	745	149	0.000271664	0.0122719	0.773,0.741,0.771	0.368,0.541,0.668	0.236
7925	ZSCAN9	7746	NC_000006.12	+	28227689	28233487	28227689	28230488	28232561	28233487	7925	161139233	0,0,1	95280294	2,5,10	2222	149	3.32e-07	0.000107612	1.0,1.0,0.94	0.761,0.79,0.663	0.242
369	GAS2L1	10634	NC_000022.11	+	29307022	29308738	29307022	29307153	29307345	29308738	369	6,6,5	0,0,0	1,21,11	0,2,7	341	149	1.94e-05	0.00178445	1.0,1.0,1.0	1.0,0.821,0.407	0.257
3741	MRPL23	6150	NC_000011.10	+	1956255	1956600	1956255	1956448	1956541	1956600	3741	17,18,10	0,0,0	20,44,20	2,50,0	242	149	1.87e-05	0.00174326	1.0,1.0,1.0	0.86,0.351,1.0	0.263
6535	LUC7L	55692	NC_000016.10	-	227241	229869	227241	228402	229278	229869	6535	75,69,102	22,13,9	25108110	33,47,51	1025	149	0.000157539	0.00835365	0.331,0.436,0.622	0.099,0.25,0.239	0.267
6179	RSRC2	65117	NC_000012.12	-	122522142	122525799	122522142	122522299	122522798	122525799	6179	37,44,44	1,0,3	25163131	6,20,12	648	149	0.000699491	0.021621	0.895,1.0,0.771	0.489,0.652,0.715	0.27
5061	SRSF11	9295	NC_000001.11	+	70247116	70250047	70247116	70247149	70249951	70250047	5061	185238221	8,11,6	130637649	41,54,54	2951	149	0.000117704	0.00683014	0.539,0.522,0.65	0.138,0.373,0.378	0.274
7396	PRPF18	8559	NC_000010.11	+	13648619	13654427	13648619	13648768	13654352	13654427	7396	146133163	0,0,1	49376333	2,2,3	5733	149	4.13e-05	0.00330902	1.0,1.0,0.809	0.389,0.83,0.743	0.282
1543	POU5F1	5460	NC_000006.12	-	31165570	31167170	31165570	31165701	31165926	31167170	1543	4,10,7	1,1,0	4,8,26	3,4,3	374	149	0.00103336	0.0271632	0.614,0.799,1.0	0.347,0.443,0.775	0.283
2620	TJAP1	93643	NC_000006.12	+	43477569	43478232	43477569	43477628	43478136	43478232	2620	43,35,66	1,1,1	7,73,100	2,6,10	657	149	0.000469253	0.0167873	0.907,0.888,0.937	0.443,0.734,0.694	0.287
9433	TRMT11	60487	NC_000006.12	+	126198798	126202131	126198798	126199900	126202027	126202131	9433	3,8,8	0,0,1	6,29,23	8,0,2	2276	149	0.000373299	0.0153077	1.0,1.0,0.344	0.047,1.0,0.43	0.289
7420	ZNF582-DT	386758	NC_000019.10	+	56397880	56399175	56397880	56398048	56398893	56399175	7420	5,10,18	0,0,0	5,13,27	0,4,1	994	149	0.00166424	0.0378653	1.0,1.0,1.0	1.0,0.328,0.802	0.29
5260	WBP1	23559	NC_000002.12	+	74455083	74455598	74455083	74455174	74455390	74455598	5260	16,13,14	1,0,2	8,32,23	2,5,16	365	149	0.000571097	0.0184885	0.867,1.0,0.741	0.62,0.723,0.37	0.298
6749	PSMD6-AS2	100507062	NC_000003.12	+	63999449	64006068	63999449	64004431	64005872	64006068	6749	64,59,74	0,0,0	13185195	2,1,6	1590	149	7.86e-05	0.00520295	1.0,1.0,1.0	0.379,0.945,0.753	0.308
30	LOC391322	391322	NT_187633.1	+	267275	268218	267275	267420	267784	268218	30	5,2,13	0,0,1	4,22,13	2,3,1	513	149	0.000105626	0.00630779	1.0,1.0,0.791	0.367,0.681,0.791	0.317
1840	C6orf141	135398	NC_000006.12	+	49550667	49553207	49550667	49552570	49552976	49553207	1840	6,7,6	1,0,0	4,6,14	1,3,1	555	149	0.000402062	0.0159756	0.617,1.0,1.0	0.518,0.349,0.79	0.32
3875	Novel.21655	NA	NW_021160015.1	+	72206	78831	72206	72360	78729	78831	3875	4,5,6	0,0,0	3,15,16	0,0,17	6518	149	3.12e-05	0.00266336	1.0,1.0,1.0	1.0,1.0,0.021	0.326
2897	DERL3	91319	NC_000022.11	-	23834502	23837154	23834502	23834932	23837063	23837154	2897	10,9,5	0,1,0	2,9,16	1,0,3	2280	149	0.00076866	0.0229516	1.0,0.37,1.0	0.116,1.0,0.258	0.332
4337	COL4A3	1285	NC_000002.12	+	227295268	227296526	227295268	227295316	227296486	227296526	4337	16,24,10	1,0,1	0,19,25	1,1,3	1319	149	0.00194908	0.0432808	0.644,1.0,0.53	0.0,0.682,0.485	0.336
1376	EML5	161436	NC_000014.9	-	88614856	88616879	88614856	88616242	88616725	88616879	1376	11,3,6	0,0,0	1,6,11	0,4,1	632	149	0.000837001	0.023946	1.0,1.0,1.0	1.0,0.261,0.722	0.339
8587	PKM	5315	NC_000015.10	-	72231323	72231802	72231323	72231391	72231517	72231802	8587	9,4,5	0,0,0	6,12,8	2,2,3	275	149	9.96e-06	0.00122513	1.0,1.0,1.0	0.619,0.765,0.591	0.342
2842	NICN1	84276	NC_000003.12	-	49419709	49420342	49419709	49419788	49420210	49420342	2842	3,11,11	0,1,0	4,41,15	3,2,3	571	149	7.87e-05	0.00520295	1.0,0.742,1.0	0.258,0.843,0.566	0.358
3044	AVIL	10677	NC_000012.12	-	57803246	57803669	57803246	57803391	57803523	57803669	3044	3,6,8	0,0,1	2,7,16	2,2,3	281	149	1.84e-05	0.00174133	1.0,1.0,0.809	0.347,0.65,0.739	0.358
7226	CEP43	11116	NC_000006.12	+	167050220	167052806	167050220	167050279	167052318	167052806	7226	50,40,53	0,0,0	36,98,98	0,5,14	2188	149	2.65e-07	9.07e-05	1.0,1.0,1.0	1.0,0.572,0.323	0.368
9039	MFSD13A	79847	NC_000010.11	+	102468286	102468842	102468286	102468332	102468752	102468842	9039	20,14,17	0,2,0	1,17,17	2,1,3	569	149	0.00053183	0.0176427	1.0,0.647,1.0	0.116,0.817,0.597	0.372
1054	CELF5	60680	NC_000019.10	+	3293318	3297076	3293318	3293486	3295043	3297076	1054	3,6,2	0,1,0	4,6,0	0,2,1	1706	149	0.00014808	0.0082152	1.0,0.344,1.0	1.0,0.208,0.0	0.379
7864	TMEM126B	55863	NC_000011.10	+	85629131	85631316	85629131	85629262	85631115	85631316	7864	66,64,80	0,0,1	18131139	3,6,3	2002	149	6.48e-06	0.000996965	1.0,1.0,0.856	0.309,0.619,0.775	0.384
1344	LOC105378626	105378626	NC_000001.11	-	31568466	31572303	31568466	31571742	31572034	31572303	1344	18,6,4	1,0,0	0,19,16	3,3,0	441	149	0.000456223	0.0167873	0.859,1.0,1.0	0.0,0.682,1.0	0.392
5286	S100A16	140576	NC_000001.11	-	153540620	153542329	153540620	153541471	153541584	153542329	5286	3,12,9	1,1,0	2,11,7	5,7,2	262	149	3.28e-05	0.00276587	0.63,0.872,1.0	0.185,0.472,0.666	0.393
7164	SLC25A51	92014	NC_000009.12	-	37903530	37905672	37903530	37903557	37904067	37905672	7164	20,29,23	2,0,2	5,37,41	4,14,6	659	149	0.00098906	0.0264878	0.693,1.0,0.722	0.22,0.374,0.607	0.405
4050	CLK2	1196	NC_000001.11	-	155268292	155269716	155268292	155268359	155269487	155269716	4050	9,8,9	0,0,0	3,11,19	0,2,4	1277	149	8.09e-06	0.00110628	1.0,1.0,1.0	1.0,0.391,0.357	0.417
5284	S100A16	140576	NC_000001.11	-	153540053	153541384	153540053	153540205	153540491	153541384	5284	21,11,10	0,0,0	5,9,10	2,1,3	435	149	1.73e-05	0.00169374	1.0,1.0,1.0	0.461,0.755,0.533	0.417
6885	EEF1D	1936	NC_000008.11	-	143592714	143597415	143592714	143592893	143593892	143597415	6885	6,7,4	0,0,0	2,36,30	2,3,0	1148	149	0.000777257	0.0230929	1.0,1.0,1.0	0.115,0.609,1.0	0.425
2905	MYL5	4636	NC_000004.12	+	674541	678765	674541	674683	678657	678765	2905	91,69,109	0,0,0	67141104	3,2,3	4123	149	5.33e-08	2.98e-05	1.0,1.0,1.0	0.447,0.718,0.556	0.426
721	DMKN	93099	NC_000019.10	-	35511410	35511593	35511410	35511469	35511520	35511593	721	10,8,13	1,1,2	3,7,7	5,3,10	200	149	9.89e-05	0.00602449	0.882,0.856,0.829	0.309,0.635,0.343	0.427
8749	SIPA1L1	26037	NC_000014.9	+	71320475	71321181	71320475	71320552	71321121	71321181	8749	2,7,1	0,0,0	2,7,8	0,4,2	718	149	8.43e-06	0.00112678	1.0,1.0,1.0	1.0,0.266,0.454	0.427
3043	MYL3	4634	NC_000003.12	-	46857871	46858272	46857871	46858101	46858230	46858272	3043	3,4,7	1,8,4	0,0,0	2,9,2	278	149	1.14e-07	4.67e-05	0.617,0.211,0.484	0.0,0.0,0.0	0.437
7931	PIDD1	55367	NC_000011.10	-	800761	801120	800761	800912	801001	801120	7931	10,11,6	3,0,1	9,7,13	8,12,10	238	149	8.87e-05	0.00562677	0.676,1.0,0.79	0.413,0.268,0.449	0.445
9126	PSPH	5723	NC_000007.14	-	56032216	56033494	56032216	56032296	56033380	56033494	9126	6,5,6	1,0,0	5,6,6	2,1,1	1233	149	8.21e-05	0.00526227	0.42,1.0,1.0	0.232,0.42,0.42	0.449
3378	BATF3	55509	NC_000001.11	-	212696960	212700527	212696960	212697078	212699672	212700527	3378	153,81,149	2,0,0	46226311	4,16,10	2743	149	2.2e-07	8.47e-05	0.806,1.0,1.0	0.384,0.434,0.628	0.453
908	CCDC61	729440	NC_000019.10	+	45995466	45996401	45995466	45995504	45996244	45996401	908	8,5,11	2,0,0	3,11,12	1,4,4	889	149	0.00109418	0.0282445	0.401,1.0,1.0	0.335,0.315,0.335	0.472
1769	TCF19	6941	NC_000006.12	+	31158588	31159707	31158588	31158722	31159142	31159707	1769	5,7,5	0,0,0	10,6,1	0,4,2	569	149	1.69e-05	0.00167429	1.0,1.0,1.0	1.0,0.282,0.116	0.534
3466	ADGRB2	576	NC_000001.11	-	31757200	31757511	31757200	31757281	31757381	31757511	3466	3,2,6	6,0,3	0,1,0	1,10,5	249	149	6.85e-06	0.00100635	0.23,1.0,0.545	0.0,0.056,0.0	0.573
1945	PPIH	10465	NC_000001.11	+	42678725	42681654	42678725	42678869	42681193	42681654	1945	7,12,15	0,0,1	4,17,10	3,1,4	2473	149	1.63e-05	0.00164394	1.0,1.0,0.475	0.074,0.506,0.131	0.588

## Sheet: 1c
Parameters	Mild CKD (n=4)	Severe CKD (n=4)	P value
Sex	Male:Female=3:1	Male:Female=2:2	NS
Age	36.3±7.8	47.5±17.5	NS
FBG (mmol/L)	6.57±1.69	5.82±0.81	NS
Proteinuria (g/24h)	2.49±2.01	10.96±7.95	0.042
eGFR (ml/min/1.73m2)	84.42±27.49	38.875±12.94	0.012
Duration of disease (y)	4±2.3	5±4.8	NS

## Sheet: 1d
Gene	Forward Primer (5’→3’)	Reverse Primer (5’→3’)
mCol1a1 (ID: 12842)	GCTCCTCTTAGGGGCCACT	CCACGTCTCACCATTGGGG
mCol3a1 (ID: 12825)	CTGTAACATGGAAACTGGGGAAA	CCATAGCTGAACTGAAAACCACC
mFn1 (ID: 14268)	ATGTGGACCCCTCCTGATAGT	GCCCAGTGATTTCAGCAAAGG
mEln (ID: 13717)	TTGCTGATCCTCTTGCTCAAC	GCCCCTGGATAATAGACTCCAC
mCcn2 (ID: 14219)	GGGCCTCTTCTGCGATTTC	ATCCAGGCAAGTGCATTGGTA
mActa2 (ID: 11475)	CCCAACTGGGACCACATGG	TACATGCGGGGGACATTGAAG
mNgal (ID: 16819)	TGGCCCTGAGTGTCATGTG	CTCTTGTAGCTCATAGATGGTGC
mKim-1 (ID: 171283)	GTTAAACCAGAGATTCCCACACG	TCTCATGGGGACAAAATGTAGTG
mβ-actin (ID:11461)	GGCTGTATTCCCCTCCATCG	CCAGTTGGTAACAATGCCATGT

## Sheet: 1e
CCN2 pre-mRNA	Forward Primer (5’→3’)	Reverse Primer (5’→3’)
In 2+ex 3	GCCTATTCTGTCACTTCGGC	CACTCCTCGCAGCATTTCC
In 3+ex 4	TCAGGGTCGTGATTCTCTCC	TCTCTTCCAGGTCAGCTTCG
